## **Non-parallel transcriptional divergence during parallel adaptation**

Eva K Fischer<sup>1,2\*</sup>, Youngseok Song<sup>3</sup>, Kimberly A Hughes<sup>4</sup>, Wen Zhou<sup>3</sup>, Kim L Hoke<sup>2</sup>

<sup>1</sup> Department of Biology, Stanford University, Stanford, CA 94305, USA

<sup>2</sup> Department of Biology, Colorado State University, Fort Collins, CO 80523, USA

<sup>3</sup> Department of Statistics, Colorado State University, Fort Collins, CO 80523, USA

<sup>4</sup> Department of Biological Science, Florida State University, Tallahassee, FL 32306 USA

\*Corresponding author:

Eva K Fischer

Department of Biology

Stanford University

371 Serra Mall

Stanford, CA 94305

efisch@stanford.edu

# Abstract

Mechanisms linking genotype to phenotype must simultaneously buffer organisms from developmental noise and allow for phenotypic plasticity in response to environmental cues. How mechanistic robustness and flexibility in biological systems bias evolution toward predictable outcomes remains an area of active debate. In this study, we leveraged phenotypic plasticity and parallel adaptation across independent lineages of Trinidadian guppies (*Poecilia reticulata*) to assess the predictability of transcriptional evolution during parallel adaptation. We observed substantial phenotypic plasticity in gene expression patterns as well as evolution of gene expression plasticity across populations. Although transcripts exhibiting expression plasticity within populations were more likely to differ in expression between populations, we found no consistent relationship between the direction of plasticity and evolutionary divergence. Similarly, while we found more overlap than expected by chance in genes differentially expressed between high- and low-predation populations from distinct lineages, the direction of expression divergence was uncoupled in the two drainages, and the majority of differentially expressed genes were not shared between lineages. Our data highlight transcriptional versatility associated with parallel phenotypic divergence in independent evolutionary lineages of a species known for rapid adaptation.

**Key words:** *Poecilia reticulata*, transcriptomics, phenotypic plasticity, adaptation, convergent evolution

# Introduction

Phenotypic evolution is biased by the mechanisms that link genetic variation to phenotypic variation, i.e. the genotype-phenotype map (Alberch 1991). Mechanisms linking genotype and phenotype are characterized by both robustness and flexibility. Robust developmental processes buffer phenotypes from noise such that multiple transcriptional, biochemical, or cellular network configurations may give rise to similar organismal phenotypes while flexibility in these processes nonetheless allows for phenotypic plasticity in response to environmental conditions (Wagner 2011; Gutierrez et al. 2013). The complex nature of the genotype-phenotype map makes it challenging to understand how mechanistic properties facilitate or constrain adaptive evolution. In this study, we combine studies of phenotypic plasticity and parallel adaptation across independent lineages to assess how mechanistic biases shape evolutionary trajectories across timescales.

One feature of biological networks that may channel divergence into particular paths is environmentally induced plasticity. The relationship between phenotypic plasticity and genetic divergence is of long-standing theoretical and empirical interest. On the one hand, plasticity may constrain adaptation by allowing successful phenotypes to be attained without genetic change, effectively shielding organisms from selection (Price et al. 2003; West-Eberhard 2003; Ghalambor et al. 2007). In contrast, plasticity may facilitate adaptation, either by increasing immediate survival and allowing time for adaptive divergence (Baldwin 1896; West-Eberhard 2003; Ghalambor et al. 2007; Lande 2009), or if non-adaptive plasticity increases the strength of selection in a novel environment (Grether 2005; Ghalambor et al. 2007; Conover et al. 2009; Velotta and Cheviron 2018). Alternatively, mechanisms mediating phenotypic plasticity might promote the accumulation of genetic variation in phenotypes, thereby fostering associations between plasticity and divergence in the early stages of adaptation to novel environments (Espinosa-Soto et al. 2011; Draghi and Whitlock 2012).

Parallel evolutionary transitions can also reveal biases in mechanisms of evolution. Similar mechanisms underlying parallel evolutionary transitions suggest the genotype-phenotype map is constrained by limited ways possible to construct adaptive phenotypes, whereas non-shared mechanisms suggest that mechanistic versatility may facilitate adaptation. One potential consequence of biological robustness is that variation affecting the function of most individual genes will have minimal phenotypic consequences, and only variation in a small number of key genes will alter organismal phenotypes. In this case, phenotypic evolution may rely repeatedly on a limited number of mechanistic ‘paths’, those that yield the greatest phenotypic responses. Indeed, compelling examples demonstrate that similar phenotypes share underlying neural,

physiological, molecular, and/or genetic mechanisms, even across highly divergent taxa (e.g. Insel and Young 2000; Manceau et al. 2010; Rosenblum et al. 2010). In contrast, other studies demonstrate versatility in underlying mechanisms suggesting that different biological ‘solutions’ can give rise to shared phenotypes in closely related species, among populations of the same species, or even among individuals of the same population (e.g. Abouheif and Wray 2002; Crawford and Oleksiak 2007; Grashow et al. 2009; Badyaev and Morrison 2018). Nevertheless, even if mechanistic versatility is a common feature of robust biological networks, shared genetic background or patterns of pleiotropy in a lineage could still direct evolutionary paths toward predictable mechanistic pathways.

In the present study, we take advantage of independent lineages of Trinidadian guppies (*Poecilia reticulata*) to explore patterns of versatility and constraint in brain gene expression during parallel phenotypic evolution. Guppies have become a model system in ecology and evolutionary biology due to repeated, independent adaptation of natural populations to distinct predation environments (Haskins et al. 1961; Endler 1995; Reznick et al. 2001). High- and low-predation population pairs from different river drainages represent independent evolutionary lineages (Gilliam et al. 1993; Barson et al. 2009; Willing et al. 2010; Fraser et al. 2015) in which colonization of low-predation environments has led to parallel, adaptive changes in life history traits, morphology, and behavior (Reznick et al. 1990, 2001; Endler 1995; Reznick 1997; Magurran 2005). Laboratory breeding designs demonstrate that the combined effects of genetic and environmental influences of predation shape life history (Torres Dowdall et al. 2012), morphology (Torres-Dowdall et al. 2012; Fischer et al. 2013; Ruell et al. 2013; Handelsman et al. 2014), physiology (Handelsman et al. 2013; Fischer et al. 2014), and behavior (Huizinga et al. 2009; Torres-Dowdall et al. 2012; Fischer et al. 2016b); however, transcriptional mechanisms underlying adaptive phenotypic differences between populations and rearing environments remain largely unexplored. A single study characterizing brain gene expression during the earliest stages of adaptation following colonization of low-predation environment found a negative relationship between phenotypic plasticity and adaptive divergence (Ghalambor et al. 2015).

Here, we compare the effects of genetic background and rearing environment on gene expression levels in the brain across two parallel, independent evolutionary lineages of guppies that diverged at least 600,000 years ago (Fajen and Breden 1992; Willing et al. 2010). We examine transcript abundance in the brain given previous evidence for behavioral plasticity in our focal populations (Fischer et al. 2016b) and because the previous gene expression study in guppies used brain tissue (Ghalambor et al. 2015). We examined the relationship between developmental plasticity and genetic divergence and characterized the evolution of plasticity in

brain gene expression between independent guppy lineages. If only a few transcriptional configurations can give rise to shared adaptive behavioral phenotypes, we expect parallel adaptation to low-predation habitats to be characterized by parallel evolution in a set of largely shared genes. In contrast, if transcriptional mechanisms of behavior are versatile, we expect gene expression divergence in largely non-overlapping gene sets. Taken together, our results allow us to assess the predictability of transcriptional mechanisms of adaptation across timescales.

## **Material and Methods**

### *Fish collection and rearing*

We established lab populations of guppies from high- and low-predation populations pairs collected from the Aripo and Quare river drainages in 2012 and 2014, respectively. To maintain the genetic variation of the original wild-caught fish, we established 20 - 30 unique family lines from each population (i.e., for each generation a single female from each family was crossed to a single male from another family) (Reznick and Bryga 1987). To minimize environmental and maternal effects, we used second-generation lab born fish from these unique family lines in this study. At birth, we split second-generation siblings into rearing environments with (pred+) or without (pred-) predator chemical cues, and they remained in these environments until the completion of the experiment (as in Fischer et al. 2016b). We used only mature males in this study. To maximize the range of genetic variation captured among focal fish, all males in a given experimental group (i.e. population and rearing environment) were from distinct families. Figure S1 shows an overview of our experimental design and interpretation of comparisons.

All guppies were individually housed in 1.5 liter tanks on a 12:12 hour light cycle at Colorado State University. Fish were fed a measured food diet once daily, receiving Tetramin™ tropical fish flake paste and hatched *Artemia* cysts on an alternating basis. Prior to tissue collection for this study, behavioral and hormone data were collected in an identical fashion for all males and these results are reported elsewhere (Fischer et al. 2016b). All experimental methods were approved by the Colorado State University Animal Care and Use Committee (Approval #12-3818A).

### *Tissue collection and processing*

We collected brain tissue from the Aripo and Quare lineage males described above in 2013 and 2015, respectively. To standardize any effects of recent experience, behavior, and circadian rhythm on gene expression, we collected whole brains within 10 minutes of lights-on. We interpret our transcriptional data as baseline, in the sense that fish were minimally stimulated

prior to tissue collection such that expression levels should reflect genetic background and developmental experience more strongly than responses to immediate environmental context. Fish were anesthetized by immersion in ice water followed by rapid decapitation. Whole brains were removed, flash frozen in liquid nitrogen, and stored at -80°C until further processing. Tissue collection took <2 minutes, rapid enough to minimize changes in gene expression from handling and dissection.

We extracted total RNA from brain tissue using the Qiagen RNeasy Lipid Tissue Mini Kit (Qiagen, Germany) following manufacturer guidelines. We prepared separate sequencing libraries for each individual using the NEBNext Ultra RNA Library Prep Kit for Illumina (New England Biolabs, Massachusetts, USA) following manufacturer instructions. Libraries were sequenced on an Illumina HiSeq 2000 at the Florida State University College of Medicine Translational Science Laboratory (Tallahassee, Florida) in May 2014 (Aripa dataset) and January 2016 (Quare dataset). For the Aripa dataset, 40 samples (N=10 per group) were combined with unique barcodes into eight samples per pool and each pool was sequenced on a single lane. For the Quare dataset, 60 samples (N=12-14 per group) were combined into three pools with 20 samples per pool and each pool was sequenced in two separate lanes. Experimental groups were balanced across lanes.

#### *Transcriptome construction and transcript abundance estimation*

Given rapid advancements in sequencing technology and our larger, more deeply sequenced dataset, we chose to construct a new transcriptome for the present study rather than using that used in Ghalambor et al. (2015). We received 465 million 100-bp paired-end reads that passed the HiSeq quality filter, averaging 11 million reads per sample. We used Rcorrector to amend Illumina sequencing errors (Song and Florea 2015) and removed adapter sequences and trimmed reads for high-quality sequence using Trim Galore! (Babraham Bioinformatics, Babraham Institute). Following developer recommendations, we used a quality score of 33, a stringency of 5, and a minimum read length of 36bp. We pooled corrected, trimmed reads from all individuals prior to transcriptome construction using Trinity (Grabherr et al. 2011; Haas et al. 2013). We used only the initial Aripa dataset to construct our high-quality transcriptome but note that all populations had a similarly high percentage of transcripts mapping back to the final transcriptome (see below).

Our initial assembly contained 411,043 transcripts (N50 = 2,025). To improve assembly quality, we filtered the assembly by clustering overlapping transcripts and retained only those transcripts longer than 250bp. We then annotated transcripts by blastx queries against SwissProt

and restricted our assembly to those transcripts with annotations to known vertebrate proteins. We used default parameters for our blastx queries with an e-value cutoff of  $10^{-10}$ . We further annotated this filtered assembly using Trinotate ([trinotate.github.io](http://trinotate.github.io)). Our final assembly contained 54,608 transcripts (N50 = 4,106) representing 23,619 presumptive genes. We used BUSCO (Simão et al. 2015) to assess assembly completeness based on conserved ortholog content across highly conserved vertebrate genes. BUSCO analysis estimated assembly completeness at 86%. We aligned corrected, trimmed reads from both datasets to our final assembly and estimated their abundance using Kallisto (Bray et al. 2016). On average, 70% of sequences per individual mapped back to our final reference transcriptome. We performed all subsequent analyses at the gene, rather than transcript, level to avoid issues introduced by our incomplete understanding of sequence and regulatory variation among populations.

### *Data filtering and screening*

Preliminary cluster analyses revealed retinal contamination in a subset of our Aripo dataset brain samples. While opsins are expressed at low levels in the brain, the very high expression levels (>10,000 copies) in three samples pointed to retinal contamination. To deal with this issue, we devised a sample filtering and screening procedure to remove genes in which expression differences between samples were likely dominated by retinal contamination. Briefly, we used contigs annotated as known retinal genes (Rhodopsin, red/green-sensitive opsins, blue-sensitive opsins) as seed contigs to identify other contamination-related transcripts based on high positive correlations of expression levels with seed genes. We calculated the gene-wise sum of correlations between candidate genes and seed genes and performed multiple hypothesis testing based on a false discovery rate (FDR) controlling procedure. The nominal level of FDR was set to  $\alpha=0.2$  to remove presumptive contaminant contigs. Using this approach, we identified 1,151 contigs as presumptive retina-enriched genes (~3% of all contigs in our final assembly) which we removed from all subsequent analyses in both datasets (Table S1). More detailed descriptions of statistical procedures are in the Supplemental Methods.

### *Differential expression analysis*

Due to differences in timing of fish rearing, sample processing, and sequencing, we did not combine Aripo and Quare datasets for statistical analysis but instead performed analysis in an identical fashion for both drainages and conducted separate analyses to explicitly compare patterns across drainages. Because standard differential expression analysis packages could not accommodate the random effects in our experimental design (see below), we performed



differential expression analysis using a modified pipeline. We normalized read counts using DESeq2 in R (Love et al. 2014) and performed differential expression analysis using the lme4 package in R (github.com/lme4). Count data were modeled using a generalized linear mixed model with negative binomial distribution. We included population of origin, rearing environment, and their interaction as fixed effects. In addition, we included family (siblings split across rearing environments) and week (tissue was collected from animals in balanced blocks across multiple weeks) as random effects. A Wald's test was performed gene-wise to obtain p-values for main effects (Lehmann and Romano 2005). We adjusted p-values for multiple hypothesis testing using the Benjamini-Hochberg procedure and called all transcripts with an adjusted p-value <0.05 differentially expressed (DE). To examine whether differential expression calls were influenced by transcript abundance, we compared mean and median counts of DE and non-DE genes using two sample t-tests and Wilcoxon rank sum tests. We also compared overall patterns of gene-wise variance between DE and non-DE groups with respect to either population or rearing effect using Siegel-Tukey tests and Kolmogorov-Smirnov tests. We performed GO term enrichment analysis for all sets of DE transcripts using annotation information for 'Biological Processes' in the topGO package in R (Alexa and Rahnenfuhrer 2016).

#### *Overlap and expression concordance in DE gene sets*

To evaluate overlap in DE transcript sets and concordance in their expression direction, we used chi-square tests of independence to test for greater than chance overlap in the number and expression concordance of transcripts based on (1) population and rearing effects within a single drainage, and (2) differentially expressed transcript sets between the two datasets. Within drainage, we compared the direction of genetic and plastic expression changes in all transcripts differentially expressed based on population of origin, even if these transcripts were not differentially expressed based on rearing environment. We reasoned that even subthreshold expression changes in response to rearing environment could affect expression divergence propensity. We used log-fold expression changes in transcript abundance to determine whether transcript expression differences were in the same (e.g. upregulated in high-predation and in response to rearing with predator cues, or down-regulated in response to genetic and environmental exposure to predation) or opposite directions (e.g. upregulated in high-predation populations, but down-regulated in response to rearing with predators, or vice versa).

Between drainages we compared those transcripts significantly differentially expressed based on population of origin in both drainages (i.e. the intersection of population DE lists) as well as those transcripts significantly differentially expressed in either drainages (i.e. the union of



population DE lists). We again used log-fold expression changes to call expression differences as being in the same of opposite direction in high-predation as compared to low-predation populations in both drainages. We excluded all transcripts with significant interaction effects from the lists of population and rearing DE transcripts used in these analyses, as characterizing simple effects of population and rearing is inappropriate when an interaction is present and we therefore explored transcripts with significant interaction effects separately (see below).

### *Analysis of transcripts with significant interaction effects*

Based on post hoc differences between rearing environments within a population ( $p < 0.05$ ), we grouped transcripts with statistically significant interaction effects into categories outlined by Renn and Schumer (Renn and Schumer 2013): (1) Assimilated: plasticity in the ancestral high-predation population but a loss of plasticity in the derived low-predation population; (2) Accommodated: a change in the degree, but not the direction, of plasticity in the derived as compared to the ancestral population; (3) Reversed: opposing directions of plasticity in high- versus low-predation populations; (4) Evolved plastic: no plasticity in the ancestral high-predation population but an emergence of plasticity in the derived low-predation population; and (5) Unclassified: all remaining transcripts which had a significant main interaction effect but no significant *post hoc* rearing differences, as the lack of pairwise rearing effects meant transcripts could not be unambiguously classified into one of the other categories. All statistical tests and data visualization were performed in R (version 3.5.1; The R Foundation for Statistical Computing). Additional details of statistical procedures are in the Supplemental Methods.

## **Results**

### *Impacts of population of origin and rearing conditions on brain transcript abundance*

In the Aripo drainage, 659 transcripts were differentially expressed (DE) between high- and low-predation populations, 738 genes were differentially expressed between pred- and pred+ fish, and 465 transcripts had interaction effects (Fig. 1; Table S2). Differentially expressed transcripts were enriched for GO categories related to metabolic processes, immune function, and nervous system development. In the Quare drainage 4,951 transcripts were differentially expressed between high- and low-predation populations, 200 genes were differentially expressed between pred- and pred+ fish, and 393 transcripts had interaction effects (Fig. 1; Table S3). Differentially expressed transcripts were enriched for GO categories related to metabolic processes, immune function, and macromolecule transport. Complete results of GO enrichment

analyses for population of origin, rearing, and interaction effects are in the Supplemental Materials (Tables S4 & S5).

While we cannot rule out some influence of technical variation, we found no evidence for differences in sequence quality, read alignment statistics, or variance in transcript abundance to suggest the greater number of differentially expressed transcripts in the Quare drainage was of technical origin. Nor did we find evidence that identification of DE transcripts was biased by transcript expression level: mean and median gene expression were significantly lower in DE (population, rearing, and/or interaction effects) as compared to non-DE transcripts in the Aripo dataset (Fig. S2; mean: DE=365.86, non-DE=451.91,  $p < 0.0001$ ; median: DE=97, non-DE=150,  $p < 0.0001$ ), whereas they were significantly higher in the Quare dataset (Fig. S2; mean: DE=460.76, non-DE=422.38,  $p < 0.0001$ ; median: DE=170, non-DE=131,  $p < 0.0001$ ). Opposing patterns between drainages suggest that identification of DE transcripts was not a side effect of relatively greater or lesser expression values of these transcripts.

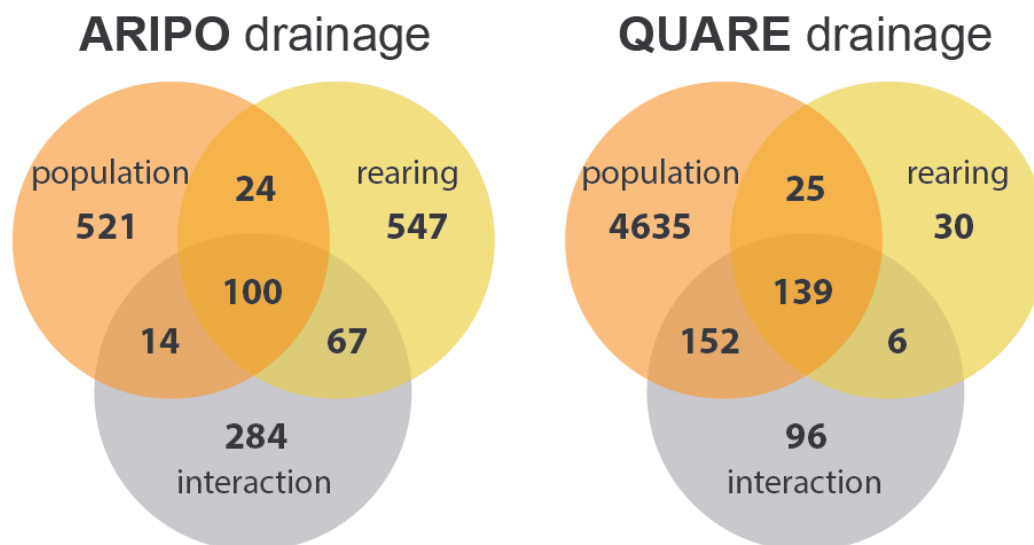

**Figure 1.** Summary of differential expression analyses. We identified many transcripts in both the Aripo (left) and Quare (right) drainages whose expression levels differed based on evolutionary history of predation (population of origin; orange), developmental experience of predation (rearing; yellow), and their interaction (grey). Transcripts with significant interaction effects were removed from analyses of population and rearing effects and analyzed separately for patterns in the evolution of plasticity.

# *Relationship between phenotypic plasticity and genetic divergence in transcript abundance*

In both drainages, the sets of transcripts with main effects of population of origin and of rearing environment overlapped more than expected by chance (Fig. 1; Aripo: 24 transcripts,  $\chi^2=24.109$ ,  $p=0.0065$ ; Quare: 25 transcripts,  $\chi^2=66.413$ ,  $p=0.0005$ ; transcripts with interaction effects excluded from analysis). Given this non-independence of population and rearing expression differences, we asked whether the direction of expression plasticity predicted gene expression divergence between populations. We did so for all population DE transcripts regardless of whether plastic expression differences were significant or not, reasoning that even small expression changes in response to rearing environment could influence divergence propensity. We found no significant relationship between the direction of population divergence and rearing expression in either drainage, with approximately 50% of transcripts showing population and rearing expression changes in the same direction and 50% showing genetic and plastic expression changes in opposite directions in both drainages (Fig. 2).

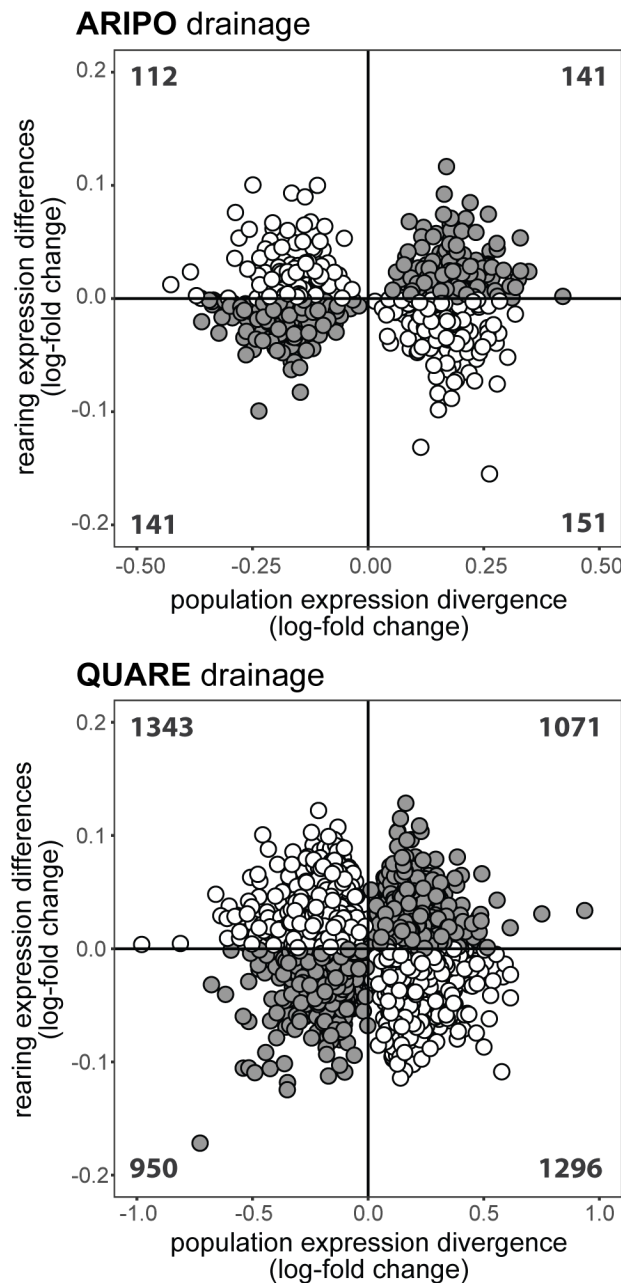

**Figure 2.** Relationship between plasticity and expression divergence. We found no relationship between evolved expression divergence and the direction of plastic expression differences: approximately half of genes differentially expressed between high- and low-predation populations have the same directions of plasticity and divergence (grey circles) and half have opposite directions (white circles) in both the Aripo (top) and Quare (middle) lineages. The number of transcripts in each quadrant is indicated on the graphs. Only those transcripts with statistically significant expression differences based on population of origin and rearing environment are plotted.

## *Evolution of expression plasticity*

To examine the evolution of expression plasticity, we grouped transcripts with significant interaction effects into one of five categories: assimilated, accommodated, reversed, evolved plastic, or unclassified. We found many transcripts that exhibited plasticity evolution, with all five categories represented in both datasets (Fig. 3). In the Aripo drainage 100 (28%) transcripts showed patterns of expression assimilation, 149 (41%) transcripts showed patterns of expression accommodation, 61 (17%) transcripts exhibited reversed plasticity, and 52 (14%) transcripts evolved plasticity in the derived population. In the Quare drainage, 84 (32%) transcripts showed patterns of expression assimilation, 51 (19%) transcripts showed patterns of expression accommodation, 57 (22%) transcripts exhibited reversed plasticity, and 72 (27%) transcripts evolved plasticity in the derived population (Fig. 3).

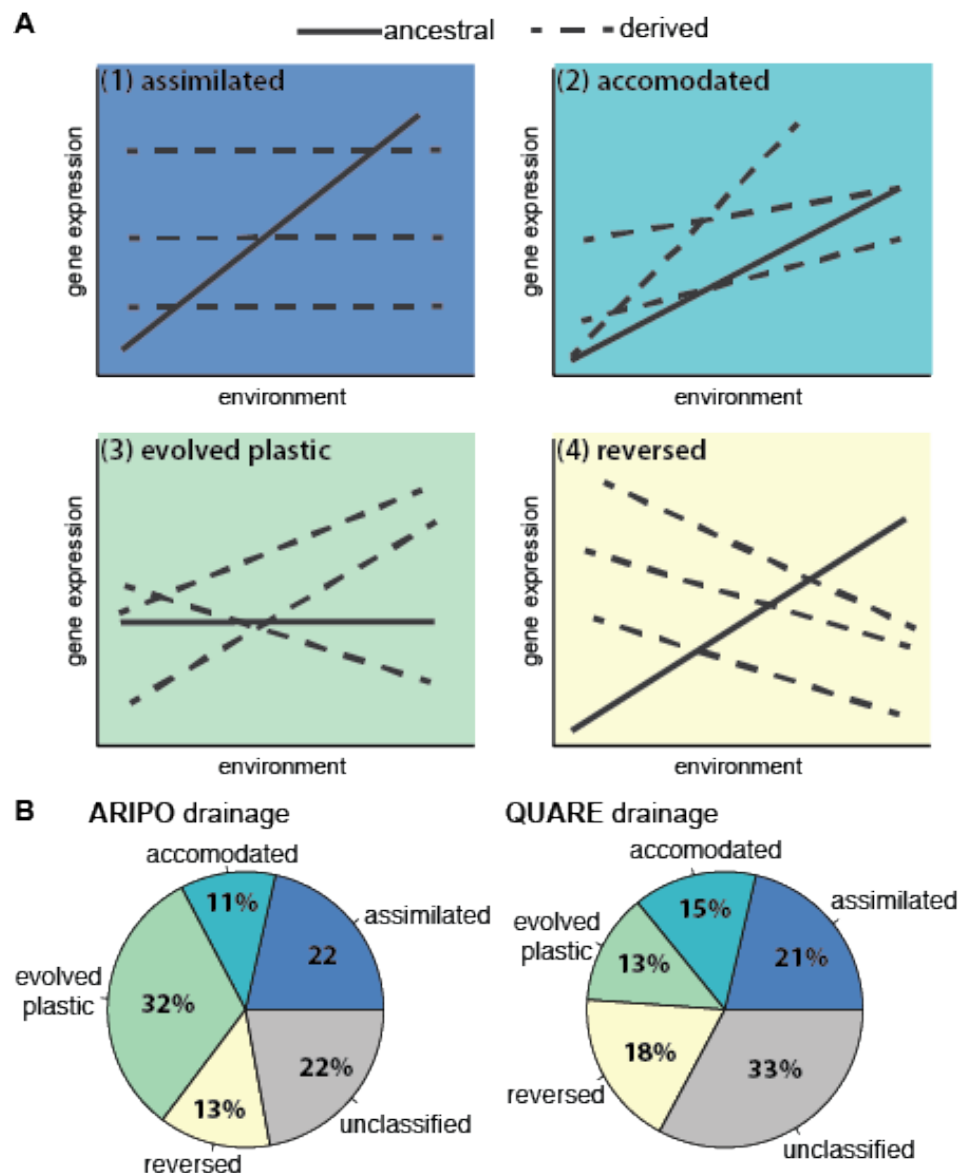

**Figure 3.** Evolution of transcript expression plasticity. (A) We grouped transcripts with significant interaction effects into one of four categories based on patterns of evolution in expression plasticity: (1) Assimilated: plasticity in the ancestral high-predation population but a loss of plasticity in the derived low-predation population; (2) Accommodated: a change in the degree, but not the direction, of plasticity in the derived as compared to the ancestral population; (3) Reversed: opposing directions of plasticity in high- versus low-predation populations; (4) Evolved plastic: no plasticity in the ancestral high-predation population but an emergence of plasticity in the derived low-predation population. We categorized remaining transcripts that had a significant main interaction effect, but no significant *post hoc* rearing differences as unclassified. Adapted from Renn & Schumer (2013). (B) All categories were represented in both datasets.

# *Parallelism across drainages in divergence and plasticity of transcript abundance*

Of the transcripts that diverged between high- and low-predation populations within a drainage (i.e., population main effect but no interaction effect), 156 were overlapping between drainages (Table S6), more than expected by chance ( $\chi^2=12.705$ ,  $p<0.0001$ ). However, the direction of expression divergence was not predictably associated in the two drainages ( $\chi^2=0.909$ ,  $p=0.422$ ): 47% had expression changes in the same direction and 53% had expression changes in opposite directions between the two drainages (Fig. 4A). Nor did we find an association of expression direction between lineages when we considered the larger collection of transcripts differentially expressed between populations in either drainage ( $\chi^2=2.583$ ,  $p=0.109$ ) (Fig. 4A).

We performed the same analysis for the rearing DE transcripts in both datasets and found only four transcripts overlapping between drainages (Table S7), marginally more than expected by chance ( $\chi^2=3.992$ ,  $p=0.069$ ), all with expression in opposite directions (Fig. 4B). When we considered the larger collection of transcripts differentially expressed between rearing environments in either drainage, we found an overrepresentation of transcripts expressed in opposite (64%) as compared to the same (36%) direction ( $\chi^2=53.90$ ,  $p<0.0001$ ) (Fig. 4B). Finally, because parallel adaptation could repeatedly target similar cellular processes and pathways even if individual transcripts don't overlap, we also compared overlap in GO terms enriched in population and rearing comparisons across drainages. We found four overlapping GO terms among those enriched in population DE transcripts in both lineages: biosynthetic processes (GO:0009058), cellular response to abiotic stimulus (GO:0071214), cellular response to toxic substance (GO:0097237), and regulation of lipid kinase activity (GO:0043550). We found no GO terms overlapping between lineages among those GO terms enriched in rearing DE transcripts.



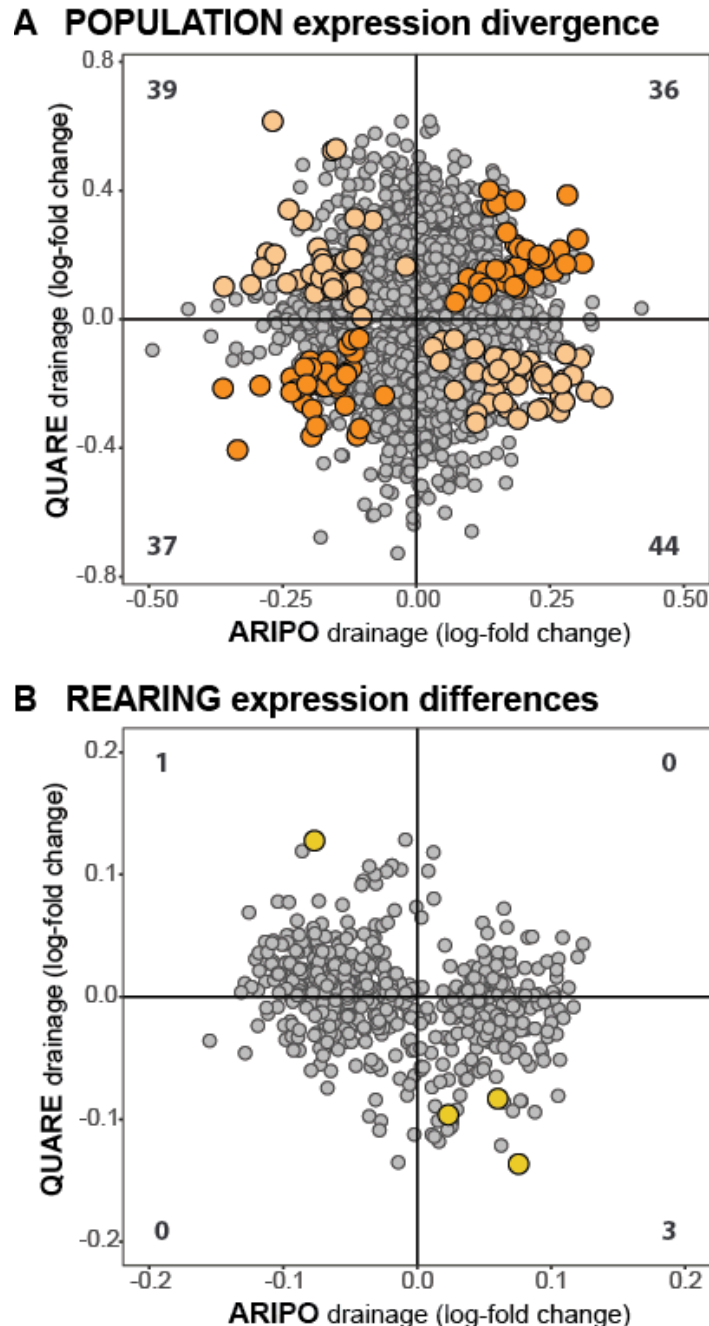

**Figure 4.** Overlap in population and rearing expression differences across evolutionary lineages. (A) Of the transcripts differentially expressed based on population of origin, 156 were overlapping between drainages. Of these, 73 were concordantly differentially expressed (i.e. genetic expression divergence in the same direction; dark orange circles) and 83 were not (i.e. genetic expression divergence in opposite directions; light orange circles), no different than expected by chance. (B) Of the transcripts differentially expressed based on rearing environment, four were overlapping in the two drainages. Of these all were non-concordantly differentially expressed (yellow circles), marginally more non-concordance than expected by chance. The number of differentially expressed transcripts in each quadrant is indicated on the graphs and transcripts differentially expressed in one but not both drainages are shown in grey.

## Discussion

We examined transcriptomic differences associated with adaptive divergence and rearing environment across repeated, independent evolutionary lineages in guppies. Within lineages, we observed phenotypic plasticity in expression patterns as well as the evolution of gene expression plasticity between high- and low-predation populations. Although plastic transcripts were more likely to exhibit population differences in expression, we found no relationship between the direction of plastic change and evolutionary divergence. Comparing across lineages, we found largely non-overlapping gene sets and no evidence for an association in the direction of expression divergence associated with parallel phenotypic divergence, suggesting that transcriptional versatility is associated with parallel phenotypic adaptation in guppies.

### *Impacts of plasticity in transcript expression on evolution*

A growing number of studies have used transcriptome and proteome surveys to address the long-standing debate on the role of plasticity in evolution, with contrasting results favoring alternative hypotheses that adaptive (Scoville and Pfrender 2010; Fraser et al. 2014; Shaw et al. 2014; Gleason and Burton 2015; Mäkinen et al. 2016; Li et al. 2018; Wang and Althoff 2019) or non-adaptive (Pespeni et al. 2013; Schaum et al. 2013; Dayan et al. 2015; Ghalambor et al. 2015; Ho and Zhang 2018) plasticity facilitates adaptation. We recently proposed that non-adaptive plasticity dominates during the earliest stages of rapid evolution, and that adaptive plasticity may contribute to subsequent fine-tuning of phenotypes (Fischer et al., 2016). In line with this prediction and our previous findings, we report here that the strong signature of non-adaptive plasticity in brain gene expression observed in guppy populations recently introduced to low-predation environments (Ghalambor et al., 2015) is not present in either of our natural, long-established low-predation populations. Experimental design differences preclude a direct comparison, as we considered patterns in all transcripts exhibiting significant expression divergence, while Ghalambor et al. (2015) focused their analyses on those transcripts for which evidence of selection was strongest (i.e. those with concordant differential expression in three low-predation populations from the same drainage, all assayed simultaneously and sharing a common ancestral population). The lack of association between the direction of plasticity and genetic divergence in our study highlights the need to directly test how ancestral plasticity relates to divergence throughout successive stages of adaptation to novel environments.

### *Evolution of plasticity in transcript expression*

Diverse transcriptional patterns could accompany evolved differences in behavioral plasticity (Renn and Schumer 2013), but relevant data characterizing the evolution of gene expression plasticity in the brain has been lacking. We observed a substantial number of transcripts with evolved differences in expression plasticity in both lineages. However, as was observed for transcriptomic evolution of gill tissue in stickleback fish (Gibbons et al. 2017), these transcripts showed no consistent pattern, with transcripts gaining, losing, and switching direction of expression plasticity between the ancestral and derived populations in both lineages. Part of this diversity in transcriptional plasticity could reflect the gains, losses, and switches in plasticity of different behaviors in these populations (Fischer et al. 2016b). Alternatively, compensatory and homeostatic mechanisms could promote diversity among evolutionary and plastic responses in transcript expression that do not alter higher-level phenotypic traits such as morphology and behavior (Renn and Schumer 2013; Fischer et al. 2016a; Badyaev 2018). In either case, because fish in low-predation habitats may experience relaxed selection on predator-induced plasticity, some of the evolution of transcriptional plasticity we report likely arose as a byproduct of genetic drift and adaptation to low-predation environments, rather than selection for altered plastic responses (Lynch 2007). Although we cannot distinguish between adaptive and non-adaptive causes, our data demonstrate evolution in gene expression plasticity accompanying adaptation within lineages.

### *Transcriptomic signatures of population divergence in two evolutionary lineages*

We identified many transcripts that were differentially expressed between high- and low-predation populations in each river drainage. The absolute number of differentially expressed transcripts was smaller in the Aripo drainage as compared to the Quare drainage, but the proportion of developmental and interaction differences was greater in the Aripo drainage. Natural populations differ in their degree of genetic divergence and hence may differ in their degree of gene expression divergence. Indeed, previous SNP analyses document less genetic divergence in the Aripo as compared to the Quare river drainage (Willing et al. 2010), consistent with our differential expression patterns.

When we compared differentially expressed transcript sets between drainages, the majority of differentially expressed transcripts were non-shared across drainages for both population effects (Aripo: 474/659; Quare: 4,766/4,951) and rearing effects (Aripo: 734/738; Quare: 196/200). Nonetheless, there was more overlap than expected by chance in population differentially expressed transcripts between lineages. Of the 156 transcripts with population main effects that were overlapping between lineages, approximately half were differentially expressed

in the same direction (i.e. concordantly differentially expressed) and half were differentially expressed in opposite direction. Thus, while the number of overlapping transcripts was more than expected by chance, there was no association in the direction of expression divergence between lineages.

A previous study in guppies performed a similar comparison of gene expression changes associated with adaptation to low-predation environments (Ghalambor et al. 2015) and found a strong signal of concordant differential expression. Whereas the present study compared long-term population divergence across drainages, Ghalambor et al. (2015) characterized early stages of adaptation of populations within the same lineage. Our contrasting results highlight the impacts of standing genetic variation within the source population on mechanisms of divergence (Feiner et al. 2017), particularly at early stages of evolution (Barrett and Schluter 2008): while alternative transcriptional ‘solutions’ are possible, shared genetic background appears to bias evolutionary outcomes toward shared patterns.

In contrast to patterns based on population effects, overlap across lineages in transcripts differentially expressed based on rearing environment was only marginally significant. Due to the very small number of rearing differentially expressed transcripts overlapping between lineages, we additionally compared patterns of expression direction in the larger collection of transcripts differentially expressed based on rearing environment in either drainage. Here we found a signature of non-concordant expression across lineages. Thus, while there was little overlap in the identity of differentially expressed transcripts, differentially expressed transcripts were nonetheless likely to show opposing expression patterns across drainages suggesting alternative transcriptional solutions.

Both adaptive and non-adaptive processes may contribute to largely non-overlapping transcriptional mechanisms giving rise to parallel life-history, morphological, and behavioral phenotypes across lineages in guppies. First, differences in standing genetic variation likely influence which mechanisms are available to selection in response to common environmental conditions in different drainages (Barrett and Schluter 2008), as described above. Second, low-predation populations are typically established by a very small number of individuals (Barson et al. 2009; Willing et al. 2010; Fraser et al. 2015), and founder effects in these populations make them susceptible to expression divergence resulting from genetic drift and inbreeding. Third, differential expression in non-overlapping transcripts may also represent adaptive responses to drainage- or site-specific environmental factors other than predation (Zandonà et al. 2011; Fitzpatrick et al. 2014). In other words, genetic similarities may channel populations within a drainage toward shared transcriptional configurations, while differences in standing genetic

variation, founder effects and bottlenecks, and drainage-specific environmental conditions result in distinct transcriptional trajectories to arrive at shared organisms level phenotypes. Nonetheless, transcriptional patterns may become more similar over time (i.e. environmentally plastic versus evolved responses) as the funneling effects of selection push populations towards those transcriptional solutions with the smallest pleiotropic load (Stern & Orgogozo, 2008; Gompel & Prud'homme, 2009). Because transcriptional network configuration – which emerges from a combination of adaptive, non-adaptive, and neutral divergence – will shape evolutionary outcomes, a holistic understanding of convergent phenotypic evolution will ultimately require an understanding of the origins and impacts of concordant and lineage-specific transcript divergence across timescales.

## *Conclusions*

We assessed the extent to which adaptation to common environments targets predictable changes in transcript expression across independent evolutionary events. Within lineages, genes with a greater expression plasticity were more likely to diverge in abundance between populations. At the same time, parallel adaptation to low-predation environments in independent lineages was associated with divergence in largely non-overlapping transcripts. While identification of shared genes is generally used as the starting point for work exploring mechanisms of parallel adaptation, we propose that parallel evolutionary transitions are not limited to a small set of possible transcriptional mechanisms in guppies. Instead, our results highlight the potential for extensive transcriptional versatility associated with parallel, adaptive trait evolution even within a single species. Transcriptional network versatility, in which diverse alternative network configurations can produce common network outputs and behavioral phenotypes, may allow underlying networks to simultaneously accommodate the influences of selection, drift, and genetic background and thereby facilitate evolution in a species known for rapid adaptation to novel environments.

## **Acknowledgements**

We thank the members of the Colorado State University Guppy Group for fish care, and in particular Sarah E Westrick and Kimberly E Dolphin for help with tissue collection. We thank Laura R Stein for assistance with tissue processing, Lauren A O'Connell for consultation on transcriptome construction and filtering, and Cameron K Ghalambor for fruitful discussions and comments on earlier versions of the manuscript. All high-powered computing was performed on

the Odyssey computing cluster supported by the FAS Science Division Research Computing Group at Harvard University.

# **Funding**

This work was supported by the National Science Foundation DDIG-1311680 (to EKF), RCN IOS-1256839 (to EKF), IOS-1354755 (to KLH), IOS-1354775 (to KAH), IOS-0934451 (to KAH), DEB-0846175 (to CKG) and IIS-1545994 (to WZ), and the US Department of Energy DE-SC0018344 (to WZ).

# References

- Abouheif, E., and G. Wray. 2002. Evolution of the gene network underlying wing polymorphism in ants. *Science*. 297:249–252.
- Alberch, P. 1991. From genes to phenotype: dynamical systems and evolvability. *Genetica*. 84(5):5–11.
- Alexa, A., and J. Rahnenfuhrer. 2016. topGO: Enrichment Analysis for Gene Ontology. R package version 2.30.1.
- Badyaev, A. V. 2018. Evolutionary transitions in controls reconcile adaptation with continuity of evolution. *Semin. Cell Dev. Biol.* 88:36-45.
- Badyaev, A. V, and E. S. Morrison. 2018. Emergent buffering balances evolvability and robustness in the evolution of phenotypic flexibility. *Evolution*. 72:647–662.
- Baldwin, J. M. 1896. A New Factor in Evolution. *Am. Nat.* 441–451.
- Barrett, R. D. H., and D. Schluter. 2008. Adaptation from standing genetic variation. *Trends Ecol. Evol.* 23:38–44.
- Barson, N. J., J. Cable, and C. Van Oosterhout. 2009. Population genetic analysis of microsatellite variation of guppies (*Poecilia reticulata*) in Trinidad and Tobago: Evidence for a dynamic source-sink metapopulation structure, founder events and population bottlenecks. *J. Evol. Biol.* 22:485–497.
- Bray, N. L., H. Pimentel, P. Melsted, and L. Pachter. 2016. Near-optimal probabilistic RNA-seq quantification. *Nat. Biotechnol.* 34:525–527.
- Conover, D. O., T. A. Duffy, and L. A. Hice. 2009. The covariance between genetic and environmental influences across ecological gradients: Reassessing the evolutionary significance of countergradient and cogeographic variation. *Ann. N. Y. Acad. Sci.* 1168:100–129.
- Crawford, D. L., and M. F. Oleksiak. 2007. The biological importance of measuring individual variation. *J. Exp. Biol.* 210:1613–1621.
- Dayan, D. I., D. L. Crawford, and M. F. Oleksiak. 2015. Phenotypic plasticity in gene expression contributes to divergence of locally adapted populations of *Fundulus heteroclitus*. *Mol. Ecol.* 24:3345–3359.
- Draghi, J. A., and M. C. Whitlock. 2012. Phenotypic plasticity facilitates mutational variance, genetic variance, and evolvability along the major axis of environmental variation. *Evolution (N. Y.)*. 66:2891–2902.
- Endler, J. A. 1995. Multiple-trait coevolution and environmental gradients in guppies. *Trends Ecol. Evol.* 10:22–29.



Espinosa-Soto, C., O. C. Martin, and A. Wagner. 2011. Phenotypic plasticity can facilitate adaptive evolution in gene regulatory circuits. *BMC Evol. Biol.* 11:1–14.

Fajen, A. V. A., and F. Breden. 1992. Mitochondrial DNA sequence variation among natural populations of the Trinidad guppy, *Poecilia reticulata*. *Evolution*. 46:1457–1465.

Feiner, N., A. Rago, G. M. While, and T. Uller. 2017. Signatures of selection in embryonic transcriptomes of lizards adapting in parallel to cool climate. *Evolution*. 72:67–81.

Fischer, E. K., C. K. Ghalambor, and K. L. Hoke. 2016a. Can a Network Approach Resolve How Adaptive vs Nonadaptive Plasticity Impacts Evolutionary Trajectories? *Integr. Comp. Biol.* 56:877–888.

Fischer, E. K., C. K. Ghalambor, and K. L. Hoke. 2016b. Plasticity and evolution in correlated suites of traits. *J. Evol. Biol.* 29:991–1002.

Fischer, E. K., R. M. Harris, H. A. Hofmann, and K. L. Hoke. 2014. Predator exposure alters stress physiology in guppies across timescales. *Horm. Behav.* 65:165–172.

Fischer, E. K., D. Soares, K. R. Archer, C. K. Ghalambor, and K. L. Hoke. 2013. Genetically and environmentally mediated divergence in lateral line morphology in the Trinidadian guppy (*Poecilia reticulata*). *J. Exp. Biol.* 216:3132–3142.

Fitzpatrick, S. W., J. Torres-Dowdall, D. N. Reznick, C. K. Ghalambor, and W. Chris Funk. 2014. Parallelism Isn't Perfect: Could Disease and Flooding Drive a Life-History Anomaly in Trinidadian Guppies? *Am. Nat.* 183:290–300.

Fraser, B. A., I. Janowitz, M. Thairu, J. Travis, K. A. Hughes, B. A. Fraser, I. Janowitz, M. Thairu, J. Travis, and K. A. Hughes. 2014. Phenotypic and genomic plasticity of alternative male reproductive tactics in sailfin mollies. *Proc. R. Soc. B Biol. Sci.* 281:20132310.

Fraser, B. A., A. Künstner, D. N. Reznick, C. Dreyer, and D. Weigel. 2015. Population genomics of natural and experimental populations of guppies (*Poecilia reticulata*). *Mol. Ecol.* 24:389–408.

Ghalambor, C. K., K. L. Hoke, E. W. Ruell, E. K. Fischer, D. N. Reznick, and K. A. Hughes. 2015. Non-adaptive plasticity potentiates rapid adaptive evolution of gene expression in nature. *Nature* 525:372–375.

Ghalambor, C. K., J. K. McKay, S. P. Carroll, and D. N. Reznick. 2007. Adaptive versus non-adaptive phenotypic plasticity and the potential for contemporary adaptation in new environments. *Funct. Ecol.* 21:394–407.

Gibbons, T. C., D. C. Metzger, T. M. Healy, and P. M. Schulte. 2017. Gene expression plasticity in response to salinity acclimation in threespine stickleback ecotypes from different salinity habitats. *Mol. Ecol.* 26:2711–2725.

Gilliam, J. F., D. F. Fraser, and M. Alkins-Koo. 1993. Structure of a Tropical Stream Fish Community : A Role for Biotic Interactions. *Ecology* 74:1856–1870.

Gleason, L. U., and R. S. Burton. 2015. RNA-seq reveals regional differences in transcriptome response to heat stress in the marine snail *Chlorostoma funebris*. *Mol. Ecol.* 24:610–627.

Gompel, N. & Prud'homme, B. 2009. The causes of repeated genetic evolution. *Developmental Biology* 332: 36–47.

Grabherr, M. G., B. J. Haas, M. Yassour, J. Z. Levin, D. A. Thompson, I. Amit, X. Adiconis, L. Fan, R. Raychowdhury, Q. Zeng, Z. Chen, E. Mauceli, N. Hacohen, A. Gnirke, N. Rhind, F. Di Palma, B. W. Birren, C. Nusbaum, K. Lindblad-Toh, N. Friedman, and A. Regev. 2011. Full-length transcriptome assembly from RNA-Seq data without a reference genome. *Nat. Biotechnol.* 29:644–652.

Grashow, R., T. Brookings, and E. Marder. 2009. Reliable neuromodulation from circuits with variable underlying structure. *Proc. Natl. Acad. Sci.* 106:11742–11746.

Grether, G. F. 2005. Environmental Change, Phenotypic Plasticity, and Genetic Compensation. *Am. Nat.* 166:E115–E123.

Gutierrez, G. J., T. O. Leary, and E. Marder. 2013. Multiple Mechanisms Switch an Electrically Coupled, Synaptically Inhibited Neuron between Competing Rhythmic Oscillators. *Neuron* 77:845–858. Elsevier Inc.

Haas, B. J., A. Papanicolaou, M. Yassour, M. Grabherr, P. D. Blood, J. Bowden, M. B. Couger, D. Eccles, B. Li, M. Lieber, M. D. Macmanes, M. Ott, J. Orvis, N. Pochet, F. Strozzi, N. Weeks, R. Westerman, T. William, C. N. Dewey, R. Henschel, R. D. Leduc, N. Friedman, and A. Regev. 2013. De novo transcript sequence reconstruction from RNA-seq using the Trinity platform for reference generation and analysis. *Nat. Protoc.* 8:1494–1512.

Handelsman, C. A., E. D. Broder, C. M. Dalton, E. W. Ruell, C. A. Myrick, D. N. Reznick, and C. K. Ghalambor. 2013. Predator-induced phenotypic plasticity in metabolism and rate of growth: Rapid adaptation to a novel environment. *Integr. Comp. Biol.* 53:975–988.

Handelsman, C. A., E. W. Ruell, J. Torres-Dowdall, and C. K. Ghalambor. 2014. Phenotypic Plasticity Changes Correlations of Traits Following Experimental Introductions of Trinidadian Guppies (*Poecilia reticulata*). *Integr. Comp. Biol.* 54:794–804.

Haskins, C., E. Haskins, J. McLaughlin, and R. Hewitt. 1961. Polymorphism and population structure in *Lebistes reticulatus*, an ecological study. Pp. 320–395 in F. Blair, ed. *Vertebrate speciation*. University of Austin Press, Austin.

Ho, W., and J. Zhang. 2018. Evolutionary adaptations to new environments generally reverse plastic phenotypic changes. *Nat. Commun.* 9:1–11.

Huizinga, M., C. K. Ghalambor, and D. N. Reznick. 2009. The genetic and environmental basis of adaptive differences in shoaling behaviour among populations of Trinidadian guppies, *Poecilia reticulata*. J. Evol. Biol. 22:1860–1866.

Insel, T. R., and L. J. Young. 2000. Neuropeptides and the evolution of social behavior. Curr. Opin. Neurobiol. 10:784–789.

Lande, R. 2009. Adaptation to an extraordinary environment by evolution of phenotypic plasticity and genetic assimilation. J. Evol. Biol. 22:1435–1446.

Lehmann, E. L., and J. P. Romano. 2005. Testing Statistical Hypotheses. Third Edit. Springer, New York.

Li, L., A. Li, K. Song, J. Meng, X. Guo, S. Li, C. Li, P. De Wit, H. Que, F. Wu, W. Wang, H. Qi, and F. Xu. 2018. Divergence and plasticity shape adaptive potential of the Pacific oyster. Nat. Ecol. Evol. 2:1751–1760.

Love, M. I., W. Huber, and S. Anders. 2014. Moderated estimation of fold change and dispersion for RNA-seq data with DESeq2. Genome Biol. 15:1–21.

Lynch, M. 2007. The frailty of adaptive hypotheses for the origins of organismal complexity. Proc. Natl. Acad. Sci. 104:8597–8604.

Magurran, A. E. 2005. Evolutionary ecology: the Trinidadian guppy. Oxford University Press, Oxford.

Mäkinen, H., S. Papakostas, L. A. Vøllestad, E. H. Leder, and C. R. Primmer. 2016. Plastic and evolutionary gene expression responses are correlated in European grayling (*Thymallus thymallus*) subpopulations adapted to different thermal environments. J. Hered. 107:82–89.

Manceau, M., V. S. Domingues, C. R. Linnen, E. B. Rosenblum, and H. E. Hoekstra. 2010. Convergence in pigmentation at multiple levels: mutations, genes and function. Philos. Trans. R. Soc. B Biol. Sci. 365:2439–2450.

Pespeni, M. H., E. Sanford, B. Gaylord, T. M. Hill, J. D. Hosfelt, H. K. Jaris, M. LaVigne, E. A. Lenz, A. D. Russell, M. K. Young, and S. R. Palumbi. 2013. Evolutionary change during experimental ocean acidification. Proc. Natl. Acad. Sci. 110:6937–6942.

Price, T. D., A. Qvarnström, and D. E. Irwin. 2003. The role of phenotypic plasticity in driving genetic evolution. Proc. R. Soc. B Biol. Sci. 270:1433–1440.

Renn, S. C. P., and M. E. Schumer. 2013. Genetic accommodation and behavioural evolution : insights from genomic studies. Anim. Behav. 85:1012–1022.

Reznick, D. A., H. Bryga, and J. A. Endler. 1990. Experimentally induced life-history evolution in a natural population. Nature 346:357–359.

Reznick, D., M. J. Butler IV, and H. Rodd. 2001. Life-History Evolution in Guppies. VII. The

Comparative Ecology of High- and Low-Predation Environments. *Am. Nat.* 157:126–140.

Reznick, D. N. 1997. Life history evolution in guppies (*Poecilia reticulata*): Guppies as a model for studying the evolutionary biology of aging. *Exp. Gerontol.* 32:245–258.

Reznick, D. N., and H. Bryga. 1987. Life-History Evolution in Guppies (*Poecilia reticulata*): 1. Phenotypic and Genetic Changes in an Introduction Experiment. *Evolution.* 41:1370.

Rosenblum, E. B., H. Rompler, T. Schoneberg, and H. E. Hoekstra. 2010. Molecular and functional basis of phenotypic convergence in white lizards at White Sands. *Proc. Natl. Acad. Sci.* 107:2113–2117.

Ruell, E. W., C. A. Handelsman, C. L. Hawkins, H. R. Sofaer, C. K. Ghalambor, and L. Angeloni. 2013. Fear, food and sexual ornamentation: plasticity of colour development in Trinidadian guppies. *Proc. R. Soc. B Biol. Sci.* 280:20122019–20122019.

Schaum, E., B. Rost, A. J. Millar, and S. Collins. 2013. Variation in plastic responses of a globally distributed picoplankton species to ocean acidification. *Nat. Clim. Chang.* 3:298–302.

Scoville, A. G., and M. E. Pfrender. 2010. Phenotypic plasticity facilitates recurrent rapid adaptation to introduced predators. *Proc. Natl. Acad. Sci.* 107:4260–4263.

Shaw, J. R., T. H. Hampton, B. L. King, A. Whitehead, F. Galvez, R. H. Gross, N. Keith, E. Notch, D. Jung, S. P. Glaholt, C. Y. Chen, J. K. Colbourne, and B. A. Stanton. 2014. Natural selection canalizes expression variation of environmentally induced plasticity-enabling genes. *Mol. Biol. Evol.* 31:3002–3015.

Simão, F. A., R. M. Waterhouse, P. Ioannidis, E. V. Kriventseva, and E. M. Zdobnov. 2015. BUSCO: Assessing genome assembly and annotation completeness with single-copy orthologs. *Bioinformatics* 31:3210–3212.

Song, L., and L. Florea. 2015. Rcorrector: Efficient and accurate error correction for Illumina RNA-seq reads. *Gigascience* 4:1–8.

Stern, D.L. & Orgogozo, V. 2008. The loci of evolution: How predictable is genetic evolution? *Evolution* 62: 2155–2177.

Torres-Dowdal, J., C. a Handelsman, D. N. Reznick, and C. K. Ghalambor. 2012. Local adaptation and the evolution of of phenotypic plasticity in Trinidadian guppies (*Poecilia reticulata*). *Evolution.* 66:3432–3443.

Torres Dowdall, J., C. A. Handelsman, E. W. Ruell, S. K. Auer, D. N. Reznick, and C. K. Ghalambor. 2012. Fine-scale local adaptation in life histories along a continuous environmental gradient in Trinidadian guppies. *Funct. Ecol.* 26:616–627.

Velotta, J. P., and Z. A. Cheviron. 2018. Remodeling Ancestral Phenotypic Plasticity in Local

Adaptation : A New Framework to Explore the Role of Genetic Compensation in the  
Evolution of Homeostasis. *Integr. Comp. Biol.* 58:1098–1110.

Wagner, A. 2011. The origins of evolutionary innovations: a theory of transformative change in  
living systems. Oxford University Press, Oxford.

Wang, S. P., and D. M. Althoff. 2019. Phenotypic plasticity facilitates initial colonization of a  
novel environment. *Evolution*. 73:303–316.

West-Eberhard, M. J. 2003. Developmental plasticity and evolution. Oxford University Press,  
New York.

Willing, E. M., P. Bentzen, C. Van Oosterhout, M. Hoffmann, J. Cable, F. Breden, D. Weigel,  
and C. Dreyer. 2010. Genome-wide single nucleotide polymorphisms reveal population  
history and adaptive divergence in wild guppies. *Mol. Ecol.* 19:968–984.

Zandonà, E., S. K. Auer, S. S. Kilham, J. L. Howard, A. López-Sepulcre, M. P. O'Connor, R. D.  
Bassar, A. Osorio, C. M. Pringle, and D. N. Reznick. 2011. Diet quality and prey selectivity  
correlate with life histories and predation regime in Trinidadian guppies. *Funct. Ecol.*  
25:964–973.
