## **Non-parallel transcriptional divergence during parallel adaptation**

Eva K Fischer<sup>1,2\*</sup>, Youngseok Song<sup>3</sup>, Kimberly A Hughes<sup>4</sup>, Wen Zhou<sup>3</sup>, Kim L Hoke<sup>2</sup>

<sup>1</sup> Department of Biology, Stanford University, Stanford, CA 94305, USA

<sup>2</sup> Department of Biology, Colorado State University, Fort Collins, CO 80523, USA

<sup>3</sup> Department of Statistics, Colorado State University, Fort Collins, CO 80523, USA

<sup>4</sup> Department of Biological Science, Florida State University, Tallahassee, FL 32306 USA

\*Corresponding author:

Eva K Fischer

Department of Biology

Stanford University

371 Serra Mall

Stanford, CA 94305

efisch@stanford.edu

1 **Abstract**

2 Mechanisms linking genotype to phenotype must simultaneously buffer organisms from  
3 developmental noise and allow for phenotypic plasticity in response to environmental cues. How  
4 mechanistic robustness and flexibility in biological systems bias evolution toward predictable  
5 outcomes remains an area of active debate. In this study, we leveraged phenotypic plasticity and  
6 parallel adaptation across independent lineages of Trinidadian guppies (*Poecilia reticulata*) to  
7 assess the predictability of transcriptional evolution during parallel adaptation. We observed  
8 substantial phenotypic plasticity in gene expression patterns as well as evolution of gene  
9 expression plasticity across populations. Although transcripts exhibiting expression plasticity  
10 within populations were more likely to differ in expression between populations, we found no  
11 consistent relationship between the direction of plasticity and evolutionary divergence. Similarly,  
12 while we found more overlap than expected by chance in genes differentially expressed between  
13 high- and low-predation populations from distinct lineages, the direction of expression divergence  
14 was uncoupled in the two drainages, and the majority of differentially expressed genes were not  
15 shared between lineages. Our data highlight transcriptional versatility associated with parallel  
16 phenotypic divergence in independent evolutionary lineages of a species known for rapid  
17 adaptation.

18

19 **Key words:** *Poecilia reticulata*, transcriptomics, phenotypic plasticity, adaptation, convergent  
20 evolution

## 21 **Introduction**

22           Phenotypic evolution is biased by the mechanisms that link genetic variation to phenotypic  
23 variation, i.e. the genotype-phenotype map (Alberch 1991). Mechanisms linking genotype and  
24 phenotype are characterized by both robustness and flexibility. Robust developmental processes  
25 buffer phenotypes from noise such that multiple transcriptional, biochemical, or cellular network  
26 configurations may give rise to similar organismal phenotypes while flexibility in these processes  
27 nonetheless allows for phenotypic plasticity in response to environmental conditions (Wagner  
28 2011; Gutierrez et al. 2013). The complex nature of the genotype-phenotype map makes it  
29 challenging to understand how mechanistic properties facilitate or constrain adaptive evolution.  
30 In this study, we combine studies of phenotypic plasticity and parallel adaptation across  
31 independent lineages to assess how mechanistic biases shape evolutionary trajectories across  
32 timescales.

33           One feature of biological networks that may channel divergence into particular paths is  
34 environmentally induced plasticity. The relationship between phenotypic plasticity and genetic  
35 divergence is of long-standing theoretical and empirical interest. On the one hand, plasticity may  
36 constrain adaptation by allowing successful phenotypes to be attained without genetic change,  
37 effectively shielding organisms from selection (Price et al. 2003; West-Eberhard 2003; Ghalambor  
38 et al. 2007). In contrast, plasticity may facilitate adaptation, either by increasing immediate  
39 survival and allowing time for adaptive divergence (Baldwin 1896; West-Eberhard 2003;  
40 Ghalambor et al. 2007; Lande 2009), or if non-adaptive plasticity increases the strength of  
41 selection in a novel environment (Grether 2005; Ghalambor et al. 2007; Conover et al. 2009;  
42 Velotta and Cheviron 2018). Alternatively, mechanisms mediating phenotypic plasticity might  
43 promote the accumulation of genetic variation in phenotypes, thereby fostering associations  
44 between plasticity and divergence in the early stages of adaptation to novel environments  
45 (Espinosa-Soto et al. 2011; Draghi and Whitlock 2012).

46           Parallel evolutionary transitions can also reveal biases in mechanisms of evolution. Similar  
47 mechanisms underlying parallel evolutionary transitions suggest the genotype-phenotype map is  
48 constrained by limited ways possible to construct adaptive phenotypes, whereas non-shared  
49 mechanisms suggest that mechanistic versatility may facilitate adaptation. One potential  
50 consequence of biological robustness is that variation affecting the function of most individual  
51 genes will have minimal phenotypic consequences, and only variation in a small number of key  
52 genes will alter organismal phenotypes. In this case, phenotypic evolution may rely repeatedly on  
53 a limited number of mechanistic ‘paths’, those that yield the greatest phenotypic responses.  
54 Indeed, compelling examples demonstrate that similar phenotypes share underlying neural,

55 physiological, molecular, and/or genetic mechanisms, even across highly divergent taxa (e.g.  
56 Insel and Young 2000; Manceau et al. 2010; Rosenblum et al. 2010). In contrast, other studies  
57 demonstrate versatility in underlying mechanisms suggesting that different biological ‘solutions’  
58 can give rise to shared phenotypes in closely related species, among populations of the same  
59 species, or even among individuals of the same population (e.g. Abouheif and Wray 2002;  
60 Crawford and Oleksiak 2007; Grashow et al. 2009; Badyaev and Morrison 2018). Nevertheless,  
61 even if mechanistic versatility is a common feature of robust biological networks, shared genetic  
62 background or patterns of pleiotropy in a lineage could still direct evolutionary paths toward  
63 predictable mechanistic pathways.

64 In the present study, we take advantage of independent lineages of Trinidadian guppies  
65 (*Poecilia reticulata*) to explore patterns of versatility and constraint in brain gene expression during  
66 parallel phenotypic evolution. Guppies have become a model system in ecology and evolutionary  
67 biology due to repeated, independent adaptation of natural populations to distinct predation  
68 environments (Haskins et al. 1961; Endler 1995; Reznick et al. 2001). High- and low-predation  
69 population pairs from different river drainages represent independent evolutionary lineages  
70 (Gilliam et al. 1993; Barson et al. 2009; Willing et al. 2010; Fraser et al. 2015) in which colonization  
71 of low-predation environments has led to parallel, adaptive changes in life history traits,  
72 morphology, and behavior (Reznick et al. 1990, 2001; Endler 1995; Reznick 1997; Magurran  
73 2005). Laboratory breeding designs demonstrate that the combined effects of genetic and  
74 environmental influences of predation shape life history (Torres Dowdall et al. 2012), morphology  
75 (Torres-Dowdal et al. 2012; Fischer et al. 2013; Ruell et al. 2013; Handelsman et al. 2014),  
76 physiology (Handelsman et al. 2013; Fischer et al. 2014), and behavior (Huizinga et al. 2009;  
77 Torres-Dowdal et al. 2012; Fischer et al. 2016b); however, transcriptional mechanisms underlying  
78 adaptive phenotypic differences between populations and rearing environments remain largely  
79 unexplored. A single study characterizing brain gene expression during the earliest stages of  
80 adaptation following colonization of low-predation environment found a negative relationship  
81 between phenotypic plasticity and adaptive divergence (Ghalambor et al. 2015).

82 Here, we compare the effects of genetic background and rearing environment on gene  
83 expression levels in the brain across two parallel, independent evolutionary lineages of guppies  
84 that diverged at least 600,000 years ago (Fajen and Breden 1992; Willing et al. 2010). We  
85 examine transcript abundance in the brain given previous evidence for behavioral plasticity in our  
86 focal populations (Fischer et al. 2016b) and because the previous gene expression study in  
87 guppies used brain tissue (Ghalambor et al. 2015). We examined the relationship between  
88 developmental plasticity and genetic divergence and characterized the evolution of plasticity in

89 brain gene expression between independent guppy lineages. If only a few transcriptional  
90 configurations can give rise to shared adaptive behavioral phenotypes, we expect parallel  
91 adaptation to low-predation habitats to be characterized by parallel evolution in a set of largely  
92 shared genes. In contrast, if transcriptional mechanisms of behavior are versatile, we expect gene  
93 expression divergence in largely non-overlapping gene sets. Taken together, our results allow us  
94 to assess the predictability of transcriptional mechanisms of adaptation across timescales.

95

## 96 **Material and Methods**

### 97 *Fish collection and rearing*

98 We established lab populations of guppies from high- and low-predation populations pairs  
99 collected from the Aripo and Quare river drainages in 2012 and 2014, respectively. To maintain  
100 the genetic variation of the original wild-caught fish, we established 20 - 30 unique family lines  
101 from each population (i.e., for each generation a single female from each family was crossed to  
102 a single male from another family) (Reznick and Bryga 1987). To minimize environmental and  
103 maternal effects, we used second-generation lab born fish from these unique family lines in this  
104 study. At birth, we split second-generation siblings into rearing environments with (pred+) or  
105 without (pred-) predator chemical cues, and they remained in these environments until the  
106 completion of the experiment (as in Fischer et al. 2016b). We used only mature males in this  
107 study. To maximize the range of genetic variation captured among focal fish, all males in a given  
108 experimental group (i.e. population and rearing environment) were from distinct families. Figure  
109 S1 shows an overview of our experimental design and interpretation of comparisons.

110 All guppies were individually housed in 1.5 liter tanks on a 12:12 hour light cycle at  
111 Colorado State University. Fish were fed a measured food diet once daily, receiving Tetramin™  
112 tropical fish flake paste and hatched *Artemia* cysts on an alternating basis. Prior to tissue  
113 collection for this study, behavioral and hormone data were collected in an identical fashion for all  
114 males and these results are reported elsewhere (Fischer et al. 2016b). All experimental methods  
115 were approved by the Colorado State University Animal Care and Use Committee (Approval #12-  
116 3818A).

117

### 118 *Tissue collection and processing*

119 We collected brain tissue from the Aripo and Quare lineage males described above in  
120 2013 and 2015, respectively. To standardize any effects of recent experience, behavior, and  
121 circadian rhythm on gene expression, we collected whole brains within 10 minutes of lights-on.  
122 We interpret our transcriptional data as baseline, in the sense that fish were minimally stimulated

123 prior to tissue collection such that expression levels should reflect genetic background and  
124 developmental experience more strongly than responses to immediate environmental context.  
125 Fish were anesthetized by immersion in ice water followed by rapid decapitation. Whole brains  
126 were removed, flash frozen in liquid nitrogen, and stored at -80°C until further processing. Tissue  
127 collection took <2 minutes, rapid enough to minimize changes in gene expression from handling  
128 and dissection.

129 We extracted total RNA from brain tissue using the Qiagen RNeasy Lipid Tissue Mini Kit  
130 (Qiagen, Germany) following manufacturer guidelines. We prepared separate sequencing  
131 libraries for each individual using the NEBNext Ultra RNA Library Prep Kit for Illumina (New  
132 England Biolabs, Massachusetts, USA) following manufacturer instructions. Libraries were  
133 sequenced on an Illumina HiSeq 2000 at the Florida State University College of Medicine  
134 Translational Science Laboratory (Tallahassee, Florida) in May 2014 (Aripo dataset) and January  
135 2016 (Quare dataset). For the Aripo dataset, 40 samples (N=10 per group) were combined with  
136 unique barcodes into eight samples per pool and each pool was sequenced on a single lane. For  
137 the Quare dataset, 60 samples (N=12-14 per group) were combined into three pools with 20  
138 samples per pool and each pool was sequenced in two separate lanes. Experimental groups were  
139 balanced across lanes.

140

#### 141 *Transcriptome construction and transcript abundance estimation*

142 Given rapid advancements in sequencing technology and our larger, more deeply  
143 sequenced dataset, we chose to construct a new transcriptome for the present study rather than  
144 using that used in Ghalambor et al. (2015). We received 465 million 100-bp paired-end reads that  
145 passed the HiSeq quality filter, averaging 11 million reads per sample. We used Rcorrector to  
146 amend Illumina sequencing errors (Song and Florea 2015) and removed adapter sequences and  
147 trimmed reads for high-quality sequence using Trim Galore! (Babraham Bioinformatics,  
148 Babraham Institute). Following developer recommendations, we used a quality score of 33, a  
149 stringency of 5, and a minimum read length of 36bp. We pooled corrected, trimmed reads from  
150 all individuals prior to transcriptome construction using Trinity (Grabherr et al. 2011; Haas et al.  
151 2013). We used only the initial Aripo dataset to construct our high-quality transcriptome but note  
152 that all populations had a similarly high percentage of transcripts mapping back to the final  
153 transcriptome (see below).

154 Our initial assembly contained 411,043 transcripts (N50 = 2,025). To improve assembly  
155 quality, we filtered the assembly by clustering overlapping transcripts and retained only those  
156 transcripts longer than 250bp. We then annotated transcripts by blastx queries against SwissProt

157 and restricted our assembly to those transcripts with annotations to known vertebrate proteins.  
158 We used default parameters for our blastx queries with an e-value cutoff of  $10^{-10}$ . We further  
159 annotated this filtered assembly using Trinotate ([trinotate.github.io](http://trinotate.github.io)). Our final assembly contained  
160 54,608 transcripts (N50 = 4,106) representing 23,619 presumptive genes. We used BUSCO  
161 (Simão et al. 2015) to assess assembly completeness based on conserved ortholog content  
162 across highly conserved vertebrate genes. BUSCO analysis estimated assembly completeness  
163 at 86%. We aligned corrected, trimmed reads from both datasets to our final assembly and  
164 estimated their abundance using Kallisto (Bray et al. 2016). On average, 70% of sequences per  
165 individual mapped back to our final reference transcriptome. We performed all subsequent  
166 analyses at the gene, rather than transcript, level to avoid issues introduced by our incomplete  
167 understanding of sequence and regulatory variation among populations.

168

### 169 *Data filtering and screening*

170 Preliminary cluster analyses revealed retinal contamination in a subset of our Aripo  
171 dataset brain samples. While opsins are expressed at low levels in the brain, the very high  
172 expression levels (>10,000 copies) in three samples pointed to retinal contamination. To deal with  
173 this issue, we devised a sample filtering and screening procedure to remove genes in which  
174 expression differences between samples were likely dominated by retinal contamination. Briefly,  
175 we used contigs annotated as known retinal genes (Rhodopsin, red/green-sensitive opsins, blue-  
176 sensitive opsins) as seed contigs to identify other contamination-related transcripts based on high  
177 positive correlations of expression levels with seed genes. We calculated the gene-wise sum of  
178 correlations between candidate genes and seed genes and performed multiple hypothesis testing  
179 based on a false discovery rate (FDR) controlling procedure. The nominal level of FDR was set  
180 to  $\alpha=0.2$  to remove presumptive contaminant contigs. Using this approach, we identified 1,151  
181 contigs as presumptive retina-enriched genes (~ 3% of all contigs in our final assembly) which we  
182 removed from all subsequent analyses in both datasets (Table S1). More detailed descriptions of  
183 statistical procedures are in the Supplemental Methods.

184

### 185 *Differential expression analysis*

186 Due to differences in timing of fish rearing, sample processing, and sequencing, we did  
187 not combine Aripo and Quare datasets for statistical analysis but instead performed analysis in  
188 an identical fashion for both drainages and conducted separate analyses to explicitly compare  
189 patterns across drainages. Because standard differential expression analysis packages could not  
190 accommodate the random effects in our experimental design (see below), we performed



191 differential expression analysis using a modified pipeline. We normalized read counts using  
192 DESeq2 in R (Love et al. 2014) and performed differential expression analysis using the lme4  
193 package in R ([github.com/lme4](https://github.com/lme4)). Count data were modeled using a generalized linear mixed  
194 model with negative binomial distribution. We included population of origin, rearing environment,  
195 and their interaction as fixed effects. In addition, we included family (siblings split across rearing  
196 environments) and week (tissue was collected from animals in balanced blocks across multiple  
197 weeks) as random effects. A Wald's test was performed gene-wise to obtain p-values for main  
198 effects (Lehmann and Romano 2005). We adjusted p-values for multiple hypothesis testing using  
199 the Benjamini-Hochberg procedure and called all transcripts with an adjusted p-value <0.05  
200 differentially expressed (DE). To examine whether differential expression calls were influenced  
201 by transcript abundance, we compared mean and median counts of DE and non-DE genes using  
202 two sample t-tests and Wilcoxon rank sum tests. We also compared overall patterns of gene-wise  
203 variance between DE and non-DE groups with respect to either population or rearing effect using  
204 Siegel-Tukey tests and Kolmogorov-Smirnov tests. We performed GO term enrichment analysis  
205 for all sets of DE transcripts using annotation information for 'Biological Processes' in the topGO  
206 package in R (Alexa and Rahnenfuhrer 2016).

207

#### 208 *Overlap and expression concordance in DE gene sets*

209 To evaluate overlap in DE transcript sets and concordance in their expression direction,  
210 we used chi-square tests of independence to test for greater than chance overlap in the number  
211 and expression concordance of transcripts based on (1) population and rearing effects within a  
212 single drainage, and (2) differentially expressed transcript sets between the two datasets. Within  
213 drainage, we compared the direction of genetic and plastic expression changes in all transcripts  
214 differentially expressed based on population of origin, even if these transcripts were not  
215 differentially expressed based on rearing environment. We reasoned that even subthreshold  
216 expression changes in response to rearing environment could affect expression divergence  
217 propensity. We used log-fold expression changes in transcript abundance to determine whether  
218 transcript expression differences were in the same (e.g. upregulated in high-predation and in  
219 response to rearing with predator cues, or down-regulated in response to genetic and  
220 environmental exposure to predation) or opposite directions (e.g. upregulated in high-predation  
221 populations, but down-regulated in response to rearing with predators, or vice versa).

222 Between drainages we compared those transcripts significantly differentially expressed  
223 based on population of origin in both drainages (i.e. the intersection of population DE lists) as well  
224 as those transcripts significantly differentially expressed in either drainages (i.e. the union of



225 population DE lists). We again used log-fold expression changes to call expression differences  
226 as being in the same of opposite direction in high-predation as compared to low-predation  
227 populations in both drainages. We excluded all transcripts with significant interaction effects from  
228 the lists of population and rearing DE transcripts used in these analyses, as characterizing simple  
229 effects of population and rearing is inappropriate when an interaction is present and we therefore  
230 explored transcripts with significant interaction effects separately (see below).

231

### 232 *Analysis of transcripts with significant interaction effects*

233 Based on post hoc differences between rearing environments within a population  
234 ( $p < 0.05$ ), we grouped transcripts with statistically significant interaction effects into categories  
235 outlined by Renn and Schumer (Renn and Schumer 2013): (1) Assimilated: plasticity in the  
236 ancestral high-predation population but a loss of plasticity in the derived low-predation population;  
237 (2) Accommodated: a change in the degree, but not the direction, of plasticity in the derived as  
238 compared to the ancestral population; (3) Reversed: opposing directions of plasticity in high-  
239 versus low-predation populations; (4) Evolved plastic: no plasticity in the ancestral high-predation  
240 population but an emergence of plasticity in the derived low-predation population; and (5)  
241 Unclassified: all remaining transcripts which had a significant main interaction effect but no  
242 significant *post hoc* rearing differences, as the lack of pairwise rearing effects meant transcripts  
243 could not be unambiguously classified into one of the other categories. All statistical tests and  
244 data visualization were performed in R (version 3.5.1; The R Foundation for Statistical  
245 Computing). Additional details of statistical procedures are in the Supplemental Methods.

246

247

## 248 **Results**

### 249 *Impacts of population of origin and rearing conditions on brain transcript abundance*

250 In the Aripo drainage, 659 transcripts were differentially expressed (DE) between high-  
251 and low-predation populations, 738 genes were differentially expressed between pred- and pred+  
252 fish, and 465 transcripts had interaction effects (Fig. 1; Table S2). Differentially expressed  
253 transcripts were enriched for GO categories related to metabolic processes, immune function,  
254 and nervous system development. In the Quare drainage 4,951 transcripts were differentially  
255 expressed between high- and low-predation populations, 200 genes were differentially expressed  
256 between pred- and pred+ fish, and 393 transcripts had interaction effects (Fig. 1; Table S3).  
257 Differentially expressed transcripts were enriched for GO categories related to metabolic  
258 processes, immune function, and macromolecule transport. Complete results of GO enrichment

259 analyses for population of origin, rearing, and interaction effects are in the Supplemental Materials  
260 (Tables S4 & S5).

261 While we cannot rule out some influence of technical variation, we found no evidence for  
262 differences in sequence quality, read alignment statistics, or variance in transcript abundance to  
263 suggest the greater number of differentially expressed transcripts in the Quare drainage was of  
264 technical origin. Nor did we find evidence that identification of DE transcripts was biased by  
265 transcript expression level: mean and median gene expression were significantly lower in DE  
266 (population, rearing, and/or interaction effects) as compared to non-DE transcripts in the Aripo  
267 dataset (Fig. S2; mean: DE=365.86, non-DE=451.91,  $p < 0.0001$ ; median: DE=97, non-DE=150,  
268  $p < 0.0001$ ), whereas they were significantly higher in the Quare dataset (Fig. S2; mean:  
269 DE=460.76, non-DE=422.38,  $p < 0.0001$ ; median: DE=170, non-DE=131,  $p < 0.0001$ ). Opposing  
270 patterns between drainages suggest that identification of DE transcripts was not a side effect of  
271 relatively greater or lesser expression values of these transcripts.

272

273

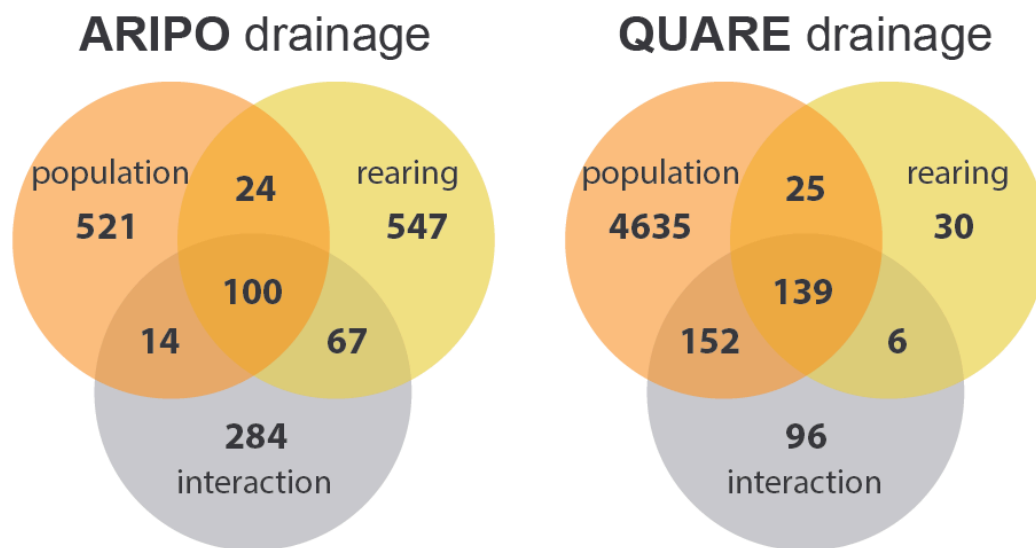

**Figure 1.** Summary of differential expression analyses. We identified many transcripts in both the Aripo (left) and Quare (right) drainages whose expression levels differed based on evolutionary history of predation (population of origin; orange), developmental experience of predation (rearing; yellow), and their interaction (grey). Transcripts with significant interaction effects were removed from analyses of population and rearing effects and analyzed separately for patterns in the evolution of plasticity.

274 *Relationship between phenotypic plasticity and genetic divergence in transcript abundance*

275         In both drainages, the sets of transcripts with main effects of population of origin and of  
276 rearing environment overlapped more than expected by chance (Fig. 1; Aripo: 24 transcripts,  
277  $\chi^2=24.109$ ,  $p=0.0065$ ; Quare: 25 transcripts,  $\chi^2=66.413$ ,  $p=0.0005$ ; transcripts with interaction  
278 effects excluded from analysis). Given this non-independence of population and rearing  
279 expression differences, we asked whether the direction of expression plasticity predicted gene  
280 expression divergence between populations. We did so for all population DE transcripts  
281 regardless of whether plastic expression differences were significant or not, reasoning that even  
282 small expression changes in response to rearing environment could influence divergence  
283 propensity. We found no significant relationship between the direction of population divergence  
284 and rearing expression in either drainage, with approximately 50% of transcripts showing  
285 population and rearing expression changes in the same direction and 50% showing genetic and  
286 plastic expression changes in opposite directions in both drainages (Fig. 2).

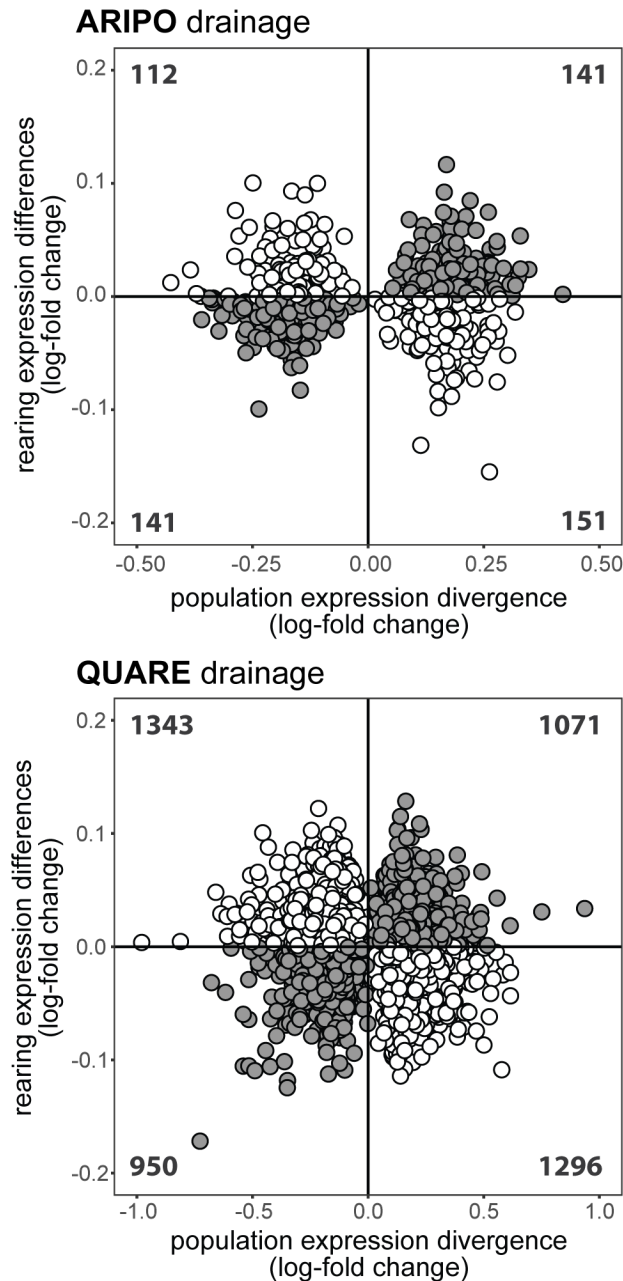

**Figure 2.** Relationship between plasticity and expression divergence. We found no relationship between evolved expression divergence and the direction of plastic expression differences: approximately half of genes differentially expressed between high- and low-predation populations have the same directions of plasticity and divergence (grey circles) and half have opposite directions (white circles) in both the Aripo (top) and Quare (middle) lineages. The number of transcripts in each quadrant is indicated on the graphs. Only those transcripts with statistically significant expression differences based on population of origin and rearing environment are plotted.

287 *Evolution of expression plasticity*

288       To examine the evolution of expression plasticity, we grouped transcripts with significant  
289 interaction effects into one of five categories: assimilated, accommodated, reversed, evolved  
290 plastic, or unclassified. We found many transcripts that exhibited plasticity evolution, with all five  
291 categories represented in both datasets (Fig. 3). In the Aripo drainage 100 (28%) transcripts  
292 showed patterns of expression assimilation, 149 (41%) transcripts showed patterns of expression  
293 accommodation, 61 (17%) transcripts exhibited reversed plasticity, and 52 (14%) transcripts  
294 evolved plasticity in the derived population. In the Quare drainage, 84 (32%) transcripts showed  
295 patterns of expression assimilation, 51 (19%) transcripts showed patterns of expression  
296 accommodation, 57 (22%) transcripts exhibited reversed plasticity, and 72 (27%) transcripts  
297 evolved plasticity in the derived population (Fig. 3).

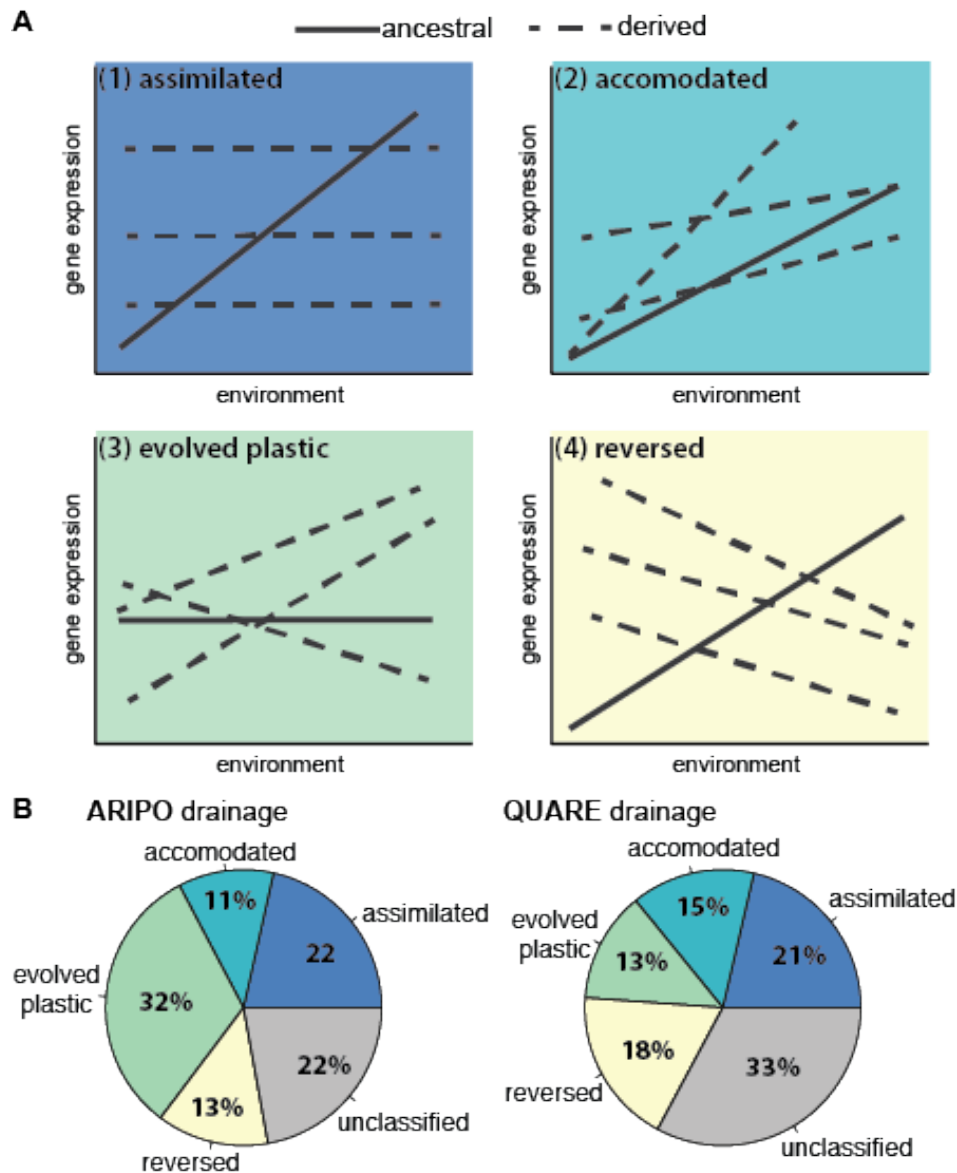

**Figure 3.** Evolution of transcript expression plasticity. (A) We grouped transcripts with significant interaction effects into one of four categories based on patterns of evolution in expression plasticity: (1) Assimilated: plasticity in the ancestral high-predation population but a loss of plasticity in the derived low-predation population; (2) Accommodated: a change in the degree, but no the direction, of plasticity in the derived as compared to the ancestral population; (3) Reversed: opposing directions of plasticity in high- versus low-predation populations; (4) Evolved plastic: no plasticity in the ancestral high-predation population but an emergence of plasticity in the derived low-predation population. We categorized remaining transcripts that had a significant main interaction effect, but no significant *post hoc* rearing differences as unclassified. Adapted from Renn & Schumer (2013). (B) All categories were represented in both datasets.

298 *Parallelism across drainages in divergence and plasticity of transcript abundance*

299       Of the transcripts that diverged between high- and low-predation populations within a  
300 drainage (i.e., population main effect but no interaction effect), 156 were overlapping between  
301 drainages (Table S6), more than expected by chance ( $\chi^2=12.705$ ,  $p<0.0001$ ). However, the  
302 direction of expression divergence was not predictably associated in the two drainages ( $\chi^2=0.909$ ,  
303  $p=0.422$ ): 47% had expression changes in the same direction and 53% had expression changes  
304 in opposite directions between the two drainages (Fig. 4A). Nor did we find an association of  
305 expression direction between lineages when we considered the larger collection of transcripts  
306 differentially expressed between populations in either drainage ( $\chi^2=2.583$ ,  $p=0.109$ ) (Fig. 4A).

307       We performed the same analysis for the rearing DE transcripts in both datasets and found  
308 only four transcripts overlapping between drainages (Table S7), marginally more than expected  
309 by chance ( $\chi^2=3.992$ ,  $p=0.069$ ), all with expression in opposite directions (Fig. 4B). When we  
310 considered the larger collection of transcripts differentially expressed between rearing  
311 environments in either drainage, we found an overrepresentation of transcripts expressed in  
312 opposite (64%) as compared to the same (36%) direction ( $\chi^2=53.90$ ,  $p<0.0001$ ) (Fig. 4B). Finally,  
313 because parallel adaptation could repeatedly target similar cellular processes and pathways even  
314 if individual transcripts don't overlap, we also compared overlap in GO terms enriched in  
315 population and rearing comparisons across drainages. We found four overlapping GO terms  
316 among those enriched in population DE transcripts in both lineages: biosynthetic processes  
317 (GO:0009058), cellular response to abiotic stimulus (GO:0071214), cellular response to toxic  
318 substance (GO:0097237), and regulation of lipid kinase activity (GO:0043550). We found no GO  
319 terms overlapping between lineages among those GO terms enriched in rearing DE transcripts.



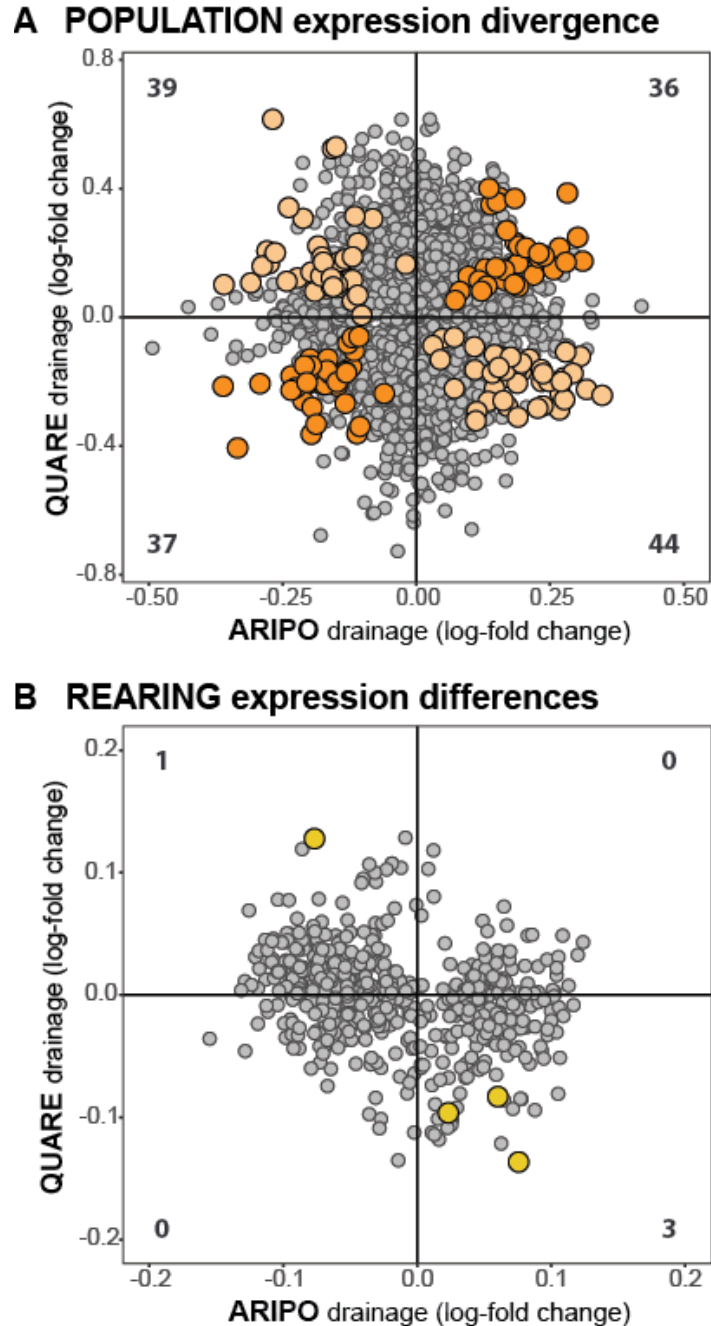

**Figure 4.** Overlap in population and rearing expression differences across evolutionary lineages. (A) Of the transcripts differentially expressed based on population of origin, 156 were overlapping between drainages. Of these, 73 were concordantly differentially expressed (i.e. genetic expression divergence in the same direction; dark orange circles) and 83 were not (i.e. genetic expression divergence in opposite directions; light orange circles), no different than expected by chance. (B) Of the transcripts differentially expressed based on rearing environment, four were overlapping in the two drainages. Of these all were non-concordantly differentially expressed (yellow circles), marginally more non-concordance than expected by chance. The number of differentially expressed transcripts in each quadrant is indicated on the graphs and transcripts differentially expressed in one but not both drainages are shown in grey.

## 320 **Discussion**

321 We examined transcriptomic differences associated with adaptive divergence and rearing  
322 environment across repeated, independent evolutionary lineages in guppies. Within lineages, we  
323 observed phenotypic plasticity in expression patterns as well as the evolution of gene expression  
324 plasticity between high- and low-predation populations. Although plastic transcripts were more  
325 likely to exhibit population differences in expression, we found no relationship between the  
326 direction of plastic change and evolutionary divergence. Comparing across lineages, we found  
327 largely non-overlapping gene sets and no evidence for an association in the direction of  
328 expression divergence associated with parallel phenotypic divergence, suggesting that  
329 transcriptional versatility is associated with parallel phenotypic adaptation in guppies.

330

### 331 *Impacts of plasticity in transcript expression on evolution*

332 A growing number of studies have used transcriptome and proteome surveys to address  
333 the long-standing debate on the role of plasticity in evolution, with contrasting results favoring  
334 alternative hypotheses that adaptive (Scoville and Pfrender 2010; Fraser et al. 2014; Shaw et al.  
335 2014; Gleason and Burton 2015; Mäkinen et al. 2016; Li et al. 2018; Wang and Althoff 2019) or  
336 non-adaptive (Pespeni et al. 2013; Schaum et al. 2013; Dayan et al. 2015; Ghalambor et al. 2015;  
337 Ho and Zhang 2018) plasticity facilitates adaptation. We recently proposed that non-adaptive  
338 plasticity dominates during the earliest stages of rapid evolution, and that adaptive plasticity may  
339 contribute to subsequent fine-tuning of phenotypes (Fischer et al., 2016). In line with this  
340 prediction and our previous findings, we report here that the strong signature of non-adaptive  
341 plasticity in brain gene expression observed in guppy populations recently introduced to low-  
342 predation environments (Ghalambor et al., 2015) is not present in either of our natural, long-  
343 established low-predation populations. Experimental design differences preclude a direct  
344 comparison, as we considered patterns in all transcripts exhibiting significant expression  
345 divergence, while Ghalambor et al. (2015) focused their analyses on those transcripts for which  
346 evidence of selection was strongest (i.e. those with concordant differential expression in three  
347 low-predation populations from the same drainage, all assayed simultaneously and sharing a  
348 common ancestral population). The lack of association between the direction of plasticity and  
349 genetic divergence in our study highlights the need to directly test how ancestral plasticity relates  
350 to divergence throughout successive stages of adaptation to novel environments.

351

### 352 *Evolution of plasticity in transcript expression*

353           Diverse transcriptional patterns could accompany evolved differences in behavioral  
354 plasticity (Renn and Schumer 2013), but relevant data characterizing the evolution of gene  
355 expression plasticity in the brain has been lacking. We observed a substantial number of  
356 transcripts with evolved differences in expression plasticity in both lineages. However, as was  
357 observed for transcriptomic evolution of gill tissue in stickleback fish (Gibbons et al. 2017), these  
358 transcripts showed no consistent pattern, with transcripts gaining, losing, and switching direction  
359 of expression plasticity between the ancestral and derived populations in both lineages. Part of  
360 this diversity in transcriptional plasticity could reflect the gains, losses, and switches in plasticity  
361 of different behaviors in these populations (Fischer et al. 2016b). Alternatively, compensatory and  
362 homeostatic mechanisms could promote diversity among evolutionary and plastic responses in  
363 transcript expression that do not alter higher-level phenotypic traits such as morphology and  
364 behavior (Renn and Schumer 2013; Fischer et al. 2016a; Badyaev 2018). In either case, because  
365 fish in low-predation habitats may experience relaxed selection on predator-induced plasticity,  
366 some of the evolution of transcriptional plasticity we report likely arose as a byproduct of genetic  
367 drift and adaptation to low-predation environments, rather than selection for altered plastic  
368 responses (Lynch 2007). Although we cannot distinguish between adaptive and non-adaptive  
369 causes, our data demonstrate evolution in gene expression plasticity accompanying adaptation  
370 within lineages.

371

### 372 *Transcriptomic signatures of population divergence in two evolutionary lineages*

373           We identified many transcripts that were differentially expressed between high- and low-  
374 predation populations in each river drainage. The absolute number of differentially expressed  
375 transcripts was smaller in the Aripo drainage as compared to the Quare drainage, but the  
376 proportion of developmental and interaction differences was greater in the Aripo drainage. Natural  
377 populations differ in their degree of genetic divergence and hence may differ in their degree of  
378 gene expression divergence. Indeed, previous SNP analyses document less genetic divergence  
379 in the Aripo as compared to the Quare river drainage (Willing et al. 2010), consistent with our  
380 differential expression patterns.

381           When we compared differentially expressed transcript sets between drainages, the  
382 majority of differentially expressed transcripts were non-shared across drainages for both  
383 population effects (Aripo: 474/659; Quare: 4,766/4,951) and rearing effects (Aripo: 734/738;  
384 Quare: 196/200). Nonetheless, there was more overlap than expected by chance in population  
385 differentially expressed transcripts between lineages. Of the 156 transcripts with population main  
386 effects that were overlapping between lineages, approximately half were differentially expressed

387 in the same direction (i.e. concordantly differentially expressed) and half were differentially  
388 expressed in opposite direction. Thus, while the number of overlapping transcripts was more than  
389 expected by chance, there was no association in the direction of expression divergence between  
390 lineages.

391 A previous study in guppies performed a similar comparison of gene expression changes  
392 associated with adaptation to low-predation environments (Ghalambor et al. 2015) and found a  
393 strong signal of concordant differential expression. Whereas the present study compared long-  
394 term population divergence across drainages, Ghalambor et al. (2015) characterized early stages  
395 of adaptation of populations within the same lineage. Our contrasting results highlight the impacts  
396 of standing genetic variation within the source population on mechanisms of divergence (Feiner  
397 et al. 2017), particularly at early stages of evolution (Barrett and Schluter 2008): while alternative  
398 transcriptional 'solutions' are possible, shared genetic background appears to bias evolutionary  
399 outcomes toward shared patterns.

400 In contrast to patterns based on population effects, overlap across lineages in transcripts  
401 differentially expressed based on rearing environment was only marginally significant. Due to the  
402 very small number of rearing differentially expressed transcripts overlapping between lineages,  
403 we additionally compared patterns of expression direction in the larger collection of transcripts  
404 differentially expressed based on rearing environment in either drainage. Here we found a  
405 signature of non-concordant expression across lineages. Thus, while there was little overlap in  
406 the identity of differentially expressed transcripts, differentially expressed transcripts were  
407 nonetheless likely to show opposing expression patterns across drainages suggesting alternative  
408 transcriptional solutions.

409 Both adaptive and non-adaptive processes may contribute to largely non-overlapping  
410 transcriptional mechanisms giving rise to parallel life-history, morphological, and behavioral  
411 phenotypes across lineages in guppies. First, differences in standing genetic variation likely  
412 influence which mechanisms are available to selection in response to common environmental  
413 conditions in different drainages (Barrett and Schluter 2008), as described above. Second, low-  
414 predation populations are typically established by a very small number of individuals (Barson et  
415 al. 2009; Willing et al. 2010; Fraser et al. 2015), and founder effects in these populations make  
416 them susceptible to expression divergence resulting from genetic drift and inbreeding. Third,  
417 differential expression in non-overlapping transcripts may also represent adaptive responses to  
418 drainage- or site-specific environmental factors other than predation (Zandonà et al. 2011;  
419 Fitzpatrick et al. 2014). In other words, genetic similarities may channel populations within a  
420 drainage toward shared transcriptional configurations, while differences in standing genetic

421 variation, founder effects and bottlenecks, and drainage-specific environmental conditions result  
422 in distinct transcriptional trajectories to arrive at shared organisms level phenotypes. Nonetheless,  
423 transcriptional patterns may become more similar over time (i.e. environmentally plastic versus  
424 evolved responses) as the funneling effects of selection push populations towards those  
425 transcriptional solutions with the smallest pleiotropic load (Stern & Orgogozo, 2008; Gompel &  
426 Prud'homme, 2009). Because transcriptional network configuration – which emerges from a  
427 combination of adaptive, non-adaptive, and neutral divergence – will shape evolutionary  
428 outcomes, a holistic understanding of convergent phenotypic evolution will ultimately require an  
429 understanding of the origins and impacts of concordant and lineage-specific transcript divergence  
430 across timescales.

431

### 432 *Conclusions*

433 We assessed the extent to which adaptation to common environments targets predictable  
434 changes in transcript expression across independent evolutionary events. Within lineages, genes  
435 with a greater expression plasticity were more likely to diverge in abundance between  
436 populations. At the same time, parallel adaptation to low-predation environments in independent  
437 lineages was associated with divergence in largely non-overlapping transcripts. While  
438 identification of shared genes is generally used as the starting point for work exploring  
439 mechanisms of parallel adaptation, we propose that parallel evolutionary transitions are not  
440 limited to a small set of possible transcriptional mechanisms in guppies. Instead, our results  
441 highlight the potential for extensive transcriptional versatility associated with parallel, adaptive  
442 trait evolution even within a single species. Transcriptional network versatility, in which diverse  
443 alternative network configurations can produce common network outputs and behavioral  
444 phenotypes, may allow underlying networks to simultaneously accommodate the influences of  
445 selection, drift, and genetic background and thereby facilitate evolution in a species known for  
446 rapid adaptation to novel environments.

447

448

### 449 **Acknowledgements**

450 We thank the members of the Colorado State University Guppy Group for fish care, and  
451 in particular Sarah E Westrick and Kimberly E Dolphin for help with tissue collection. We thank  
452 Laura R Stein for assistance with tissue processing, Lauren A O'Connell for consultation on  
453 transcriptome construction and filtering, and Cameron K Ghalambor for fruitful discussions and  
454 comments on earlier versions of the manuscript. All high-powered computing was performed on

455 the Odyssey computing cluster supported by the FAS Science Division Research Computing  
456 Group at Harvard University.

457

458

459 **Funding**

460 This work was supported by the National Science Foundation DDIG-1311680 (to EKF),  
461 RCN IOS-1256839 (to EKF), IOS-1354755 (to KLH), IOS-1354775 (to KAH), IOS-0934451 (to  
462 KAH), DEB-0846175 (to CKG) and IIS-1545994 (to WZ), and the US Department of Energy DE-  
463 SC0018344 (to WZ).

464 **References**

- 465 Abouheif, E., and G. Wray. 2002. Evolution of the gene network underlying wing polymorphism  
466 in ants. *Science*. 297:249–252.
- 467 Alberch, P. 1991. From genes to phenotype: dynamical systems and evolvability. *Genetica*.  
468 84(5):5–11.
- 469 Alexa, A., and J. Rahnenfuhrer. 2016. topGO: Enrichment Analysis for Gene Ontology. R  
470 package version 2.30.1.
- 471 Badyaev, A. V. 2018. Evolutionary transitions in controls reconcile adaptation with continuity of  
472 evolution. *Semin. Cell Dev. Biol.* 88:36–45.
- 473 Badyaev, A. V, and E. S. Morrison. 2018. Emergent buffering balances evolvability and  
474 robustness in the evolution of phenotypic flexibility. *Evolution*. 72:647–662.
- 475 Baldwin, J. M. 1896. A New Factor in Evolution. *Am. Nat.* 441–451.
- 476 Barrett, R. D. H., and D. Schluter. 2008. Adaptation from standing genetic variation. *Trends*  
477 *Ecol. Evol.* 23:38–44.
- 478 Barson, N. J., J. Cable, and C. Van Oosterhout. 2009. Population genetic analysis of  
479 microsatellite variation of guppies (*Poecilia reticulata*) in Trinidad and Tobago: Evidence for  
480 a dynamic source-sink metapopulation structure, founder events and population  
481 bottlenecks. *J. Evol. Biol.* 22:485–497.
- 482 Bray, N. L., H. Pimentel, P. Melsted, and L. Pachter. 2016. Near-optimal probabilistic RNA-seq  
483 quantification. *Nat. Biotechnol.* 34:525–527.
- 484 Conover, D. O., T. A. Duffy, and L. A. Hice. 2009. The covariance between genetic and  
485 environmental influences across ecological gradients: Reassessing the evolutionary  
486 significance of countergradient and cogradient variation. *Ann. N. Y. Acad. Sci.* 1168:100–  
487 129.
- 488 Crawford, D. L., and M. F. Oleksiak. 2007. The biological importance of measuring individual  
489 variation. *J. Exp. Biol.* 210:1613–1621.
- 490 Dayan, D. I., D. L. Crawford, and M. F. Oleksiak. 2015. Phenotypic plasticity in gene expression  
491 contributes to divergence of locally adapted populations of *Fundulus heteroclitus*. *Mol.*  
492 *Ecol.* 24:3345–3359.
- 493 Draghi, J. A., and M. C. Whitlock. 2012. Phenotypic plasticity facilitates mutational variance,  
494 genetic variance, and evolvability along the major axis of environmental variation. *Evolution*  
495 (N. Y). 66:2891–2902.
- 496 Endler, J. A. 1995. Multiple-trait coevolution and environmental gradients in guppies. *Trends*  
497 *Ecol. Evol.* 10:22–29.



- 498 Espinosa-Soto, C., O. C. Martin, and A. Wagner. 2011. Phenotypic plasticity can facilitate  
499 adaptive evolution in gene regulatory circuits. *BMC Evol. Biol.* 11:1–14.
- 500 Fajen, A. V. A., and F. Breden. 1992. Mitochondrial DNA sequence variation among natural  
501 populations of the Trinidad guppy, *Poecilia reticulata*. *Evolution.* 46:1457–1465.
- 502 Feiner, N., A. Rago, G. M. While, and T. Uller. 2017. Signatures of selection in embryonic  
503 transcriptomes of lizards adapting in parallel to cool climate. *Evolution.* 72:67–81.
- 504 Fischer, E. K., C. K. Ghalambor, and K. L. Hoke. 2016a. Can a Network Approach Resolve How  
505 Adaptive vs Nonadaptive Plasticity Impacts Evolutionary Trajectories? *Integr. Comp. Biol.*  
506 56:877–888.
- 507 Fischer, E. K., C. K. Ghalambor, and K. L. Hoke. 2016b. Plasticity and evolution in correlated  
508 suites of traits. *J. Evol. Biol.* 29:991–1002.
- 509 Fischer, E. K., R. M. Harris, H. A. Hofmann, and K. L. Hoke. 2014. Predator exposure alters  
510 stress physiology in guppies across timescales. *Horm. Behav.* 65:165–172.
- 511 Fischer, E. K., D. Soares, K. R. Archer, C. K. Ghalambor, and K. L. Hoke. 2013. Genetically and  
512 environmentally mediated divergence in lateral line morphology in the Trinidadian guppy  
513 (*Poecilia reticulata*). *J. Exp. Biol.* 216:3132–3142.
- 514 Fitzpatrick, S. W., J. Torres-Dowdall, D. N. Reznick, C. K. Ghalambor, and W. Chris Funk. 2014.  
515 Parallelism Isn't Perfect: Could Disease and Flooding Drive a Life-History Anomaly in  
516 Trinidadian Guppies? *Am. Nat.* 183:290–300.
- 517 Fraser, B. A., I. Janowitz, M. Thairu, J. Travis, K. A. Hughes, B. A. Fraser, I. Janowitz, M.  
518 Thairu, J. Travis, and K. A. Hughes. 2014. Phenotypic and genomic plasticity of alternative  
519 male reproductive tactics in sailfin mollies. *Proc. R. Soc. B Biol. Sci.* 281:20132310.
- 520 Fraser, B. A., A. Künstner, D. N. Reznick, C. Dreyer, and D. Weigel. 2015. Population genomics  
521 of natural and experimental populations of guppies (*Poecilia reticulata*). *Mol. Ecol.* 24:389–  
522 408.
- 523 Ghalambor, C. K., K. L. Hoke, E. W. Ruell, E. K. Fischer, D. N. Reznick, and K. A. Hughes.  
524 2015. Non-adaptive plasticity potentiates rapid adaptive evolution of gene expression in  
525 nature. *Nature* 525:372–375.
- 526 Ghalambor, C. K., J. K. McKay, S. P. Carroll, and D. N. Reznick. 2007. Adaptive versus non-  
527 adaptive phenotypic plasticity and the potential for contemporary adaptation in new  
528 environments. *Funct. Ecol.* 21:394–407.
- 529 Gibbons, T. C., D. C. Metzger, T. M. Healy, and P. M. Schulte. 2017. Gene expression plasticity  
530 in response to salinity acclimation in threespine stickleback ecotypes from different salinity  
531 habitats. *Mol. Ecol.* 26:2711–2725.

- 532 Gilliam, J. F., D. F. Fraser, and M. Alkins-Koo. 1993. Structure of a Tropical Stream Fish  
533 Community : A Role for Biotic Interactions. *Ecology* 74:1856–1870.
- 534 Gleason, L. U., and R. S. Burton. 2015. RNA-seq reveals regional differences in transcriptome  
535 response to heat stress in the marine snail *Chlorostoma funebris*. *Mol. Ecol.* 24:610–627.
- 536 Gompel, N. & Prud'homme, B. 2009. The causes of repeated genetic evolution. *Developmental*  
537 *Biology* 332: 36–47.
- 538 Grabherr, M. G., B. J. Haas, M. Yassour, J. Z. Levin, D. A. Thompson, I. Amit, X. Adiconis, L.  
539 Fan, R. Raychowdhury, Q. Zeng, Z. Chen, E. Mauceli, N. Hacohen, A. Gnirke, N. Rhind, F.  
540 Di Palma, B. W. Birren, C. Nusbaum, K. Lindblad-Toh, N. Friedman, and A. Regev. 2011.  
541 Full-length transcriptome assembly from RNA-Seq data without a reference genome. *Nat.*  
542 *Biotechnol.* 29:644–652.
- 543 Grashow, R., T. Brookings, and E. Marder. 2009. Reliable neuromodulation from circuits with  
544 variable underlying structure. *Proc. Natl. Acad. Sci.* 106:11742–11746.
- 545 Grether, G. F. 2005. Environmental Change, Phenotypic Plasticity, and Genetic Compensation.  
546 *Am. Nat.* 166:E115–E123.
- 547 Gutierrez, G. J., T. O. Leary, and E. Marder. 2013. Multiple Mechanisms Switch an Electrically  
548 Coupled, Synaptically Inhibited Neuron between Competing Rhythmic Oscillators. *Neuron*  
549 77:845–858. Elsevier Inc.
- 550 Haas, B. J., A. Papanicolaou, M. Yassour, M. Grabherr, P. D. Blood, J. Bowden, M. B. Couger,  
551 D. Eccles, B. Li, M. Lieber, M. D. Macmanes, M. Ott, J. Orvis, N. Pochet, F. Strozzi, N.  
552 Weeks, R. Westerman, T. William, C. N. Dewey, R. Henschel, R. D. Leduc, N. Friedman,  
553 and A. Regev. 2013. De novo transcript sequence reconstruction from RNA-seq using the  
554 Trinity platform for reference generation and analysis. *Nat. Protoc.* 8:1494–1512.
- 555 Handelsman, C. A., E. D. Broder, C. M. Dalton, E. W. Ruell, C. A. Myrick, D. N. Reznick, and C.  
556 K. Ghalambor. 2013. Predator-induced phenotypic plasticity in metabolism and rate of  
557 growth: Rapid adaptation to a novel environment. *Integr. Comp. Biol.* 53:975–988.
- 558 Handelsman, C. A., E. W. Ruell, J. Torres-Dowdall, and C. K. Ghalambor. 2014. Phenotypic  
559 Plasticity Changes Correlations of Traits Following Experimental Introductions of  
560 Trinidadian Guppies (*Poecilia reticulata*). *Integr. Comp. Biol.* 54:794–804.
- 561 Haskins, C., E. Haskins, J. McLaughlin, and R. Hewitt. 1961. Polymorphism and population  
562 structure in *Lebistes reticulatus*, an ecological study. Pp. 320–395 in F. Blair, ed.  
563 Vertebrate speciation. University of Austin Press, Austin.
- 564 Ho, W., and J. Zhang. 2018. Evolutionary adaptations to new environments generally reverse  
565 plastic phenotypic changes. *Nat. Commun.* 9:1–11.

- 566 Huizinga, M., C. K. Ghalambor, and D. N. Reznick. 2009. The genetic and environmental basis  
567 of adaptive differences in shoaling behaviour among populations of Trinidadian guppies,  
568 *Poecilia reticulata*. *J. Evol. Biol.* 22:1860–1866.
- 569 Insel, T. R., and L. J. Young. 2000. Neuropeptides and the evolution of social behavior. *Curr.*  
570 *Opin. Neurobiol.* 10:784–789.
- 571 Lande, R. 2009. Adaptation to an extraordinary environment by evolution of phenotypic plasticity  
572 and genetic assimilation. *J. Evol. Biol.* 22:1435–1446.
- 573 Lehmann, E. L., and J. P. Romano. 2005. Testing Statistical Hypotheses. Third Edit. Springer,  
574 New York.
- 575 Li, L., A. Li, K. Song, J. Meng, X. Guo, S. Li, C. Li, P. De Wit, H. Que, F. Wu, W. Wang, H. Qi,  
576 and F. Xu. 2018. Divergence and plasticity shape adaptive potential of the Pacific oyster.  
577 *Nat. Ecol. Evol.* 2:1751–1760.
- 578 Love, M. I., W. Huber, and S. Anders. 2014. Moderated estimation of fold change and  
579 dispersion for RNA-seq data with DESeq2. *Genome Biol.* 15:1–21.
- 580 Lynch, M. 2007. The frailty of adaptive hypotheses for the origins of organismal complexity.  
581 *Proc. Natl. Acad. Sci.* 104:8597–8604.
- 582 Magurran, A. E. 2005. Evolutionary ecology: the Trinidadian guppy. Oxford University Press,  
583 Oxford.
- 584 Mäkinen, H., S. Papakostas, L. A. Vøllestad, E. H. Leder, and C. R. Primmer. 2016. Plastic and  
585 evolutionary gene expression responses are correlated in European grayling (*Thymallus*  
586 *thymallus*) subpopulations adapted to different thermal environments. *J. Hered.* 107:82–89.
- 587 Manceau, M., V. S. Domingues, C. R. Linnen, E. B. Rosenblum, and H. E. Hoekstra. 2010.  
588 Convergence in pigmentation at multiple levels: mutations, genes and function. *Philos.*  
589 *Trans. R. Soc. B Biol. Sci.* 365:2439–2450.
- 590 Pespeni, M. H., E. Sanford, B. Gaylord, T. M. Hill, J. D. Hosfelt, H. K. Jaris, M. LaVigne, E. A.  
591 Lenz, A. D. Russell, M. K. Young, and S. R. Palumbi. 2013. Evolutionary change during  
592 experimental ocean acidification. *Proc. Natl. Acad. Sci.* 110:6937–6942.
- 593 Price, T. D., A. Qvarnström, and D. E. Irwin. 2003. The role of phenotypic plasticity in driving  
594 genetic evolution. *Proc. R. Soc. B Biol. Sci.* 270:1433–1440.
- 595 Renn, S. C. P., and M. E. Schumer. 2013. Genetic accommodation and behavioural evolution :  
596 insights from genomic studies. *Anim. Behav.* 85:1012–1022.
- 597 Reznick, D. A., H. Bryga, and J. A. Endler. 1990. Experimentally induced life-history evolution in  
598 a natural population. *Nature* 346:357–359.
- 599 Reznick, D., M. J. Butler IV, and H. Rodd. 2001. Life-History Evolution in Guppies. VII. The

- 600 Comparative Ecology of High- and Low-Predation Environments. *Am. Nat.* 157:126–140.
- 601 Reznick, D. N. 1997. Life history evolution in guppies (*Poecilia reticulata*): Guppies as a model  
602 for studying the evolutionary biology of aging. *Exp. Gerontol.* 32:245–258.
- 603 Reznick, D. N., and H. Bryga. 1987. Life-History Evolution in Guppies (*Poecilia reticulata*): 1.  
604 Phenotypic and Genetic Changes in an Introduction Experiment. *Evolution.* 41:1370.
- 605 Rosenblum, E. B., H. Rompler, T. Schoneberg, and H. E. Hoekstra. 2010. Molecular and  
606 functional basis of phenotypic convergence in white lizards at White Sands. *Proc. Natl.*  
607 *Acad. Sci.* 107:2113–2117.
- 608 Ruell, E. W., C. A. Handelsman, C. L. Hawkins, H. R. Sofaer, C. K. Ghalambor, and L. Angeloni.  
609 2013. Fear, food and sexual ornamentation: plasticity of colour development in Trinidadian  
610 guppies. *Proc. R. Soc. B Biol. Sci.* 280:20122019–20122019.
- 611 Schaum, E., B. Rost, A. J. Millar, and S. Collins. 2013. Variation in plastic responses of a  
612 globally distributed picoplankton species to ocean acidification. *Nat. Clim. Chang.* 3:298–  
613 302.
- 614 Scoville, A. G., and M. E. Pfrender. 2010. Phenotypic plasticity facilitates recurrent rapid  
615 adaptation to introduced predators. *Proc. Natl. Acad. Sci.* 107:4260–4263.
- 616 Shaw, J. R., T. H. Hampton, B. L. King, A. Whitehead, F. Galvez, R. H. Gross, N. Keith, E.  
617 Notch, D. Jung, S. P. Glaholt, C. Y. Chen, J. K. Colbourne, and B. A. Stanton. 2014.  
618 Natural selection canalizes expression variation of environmentally induced plasticity-  
619 enabling genes. *Mol. Biol. Evol.* 31:3002–3015.
- 620 Simão, F. A., R. M. Waterhouse, P. Ioannidis, E. V. Kriventseva, and E. M. Zdobnov. 2015.  
621 BUSCO: Assessing genome assembly and annotation completeness with single-copy  
622 orthologs. *Bioinformatics* 31:3210–3212.
- 623 Song, L., and L. Florea. 2015. Rcorrector: Efficient and accurate error correction for Illumina  
624 RNA-seq reads. *Gigascience* 4:1–8.
- 625 Stern, D.L. & Orgogozo, V. 2008. The loci of evolution: How predictable is genetic evolution?  
626 *Evolution* 62: 2155–2177.
- 627 Torres-Dowdal, J., C. a Handelsman, D. N. Reznick, and C. K. Ghalambor. 2012. Local  
628 adaptation and the evolution of of phenotypic plasticity in Trinidadian guppies (*Poecilia*  
629 *reticulata*). *Evolution.* 66:3432–3443.
- 630 Torres Dowdall, J., C. A. Handelsman, E. W. Ruell, S. K. Auer, D. N. Reznick, and C. K.  
631 Ghalambor. 2012. Fine-scale local adaptation in life histories along a continuous  
632 environmental gradient in Trinidadian guppies. *Funct. Ecol.* 26:616–627.
- 633 Velotta, J. P., and Z. A. Cheviron. 2018. Remodeling Ancestral Phenotypic Plasticity in Local

- 634           Adaptation : A New Framework to Explore the Role of Genetic Compensation in the  
635           Evolution of Homeostasis. *Integr. Comp. Biol.* 58:1098–1110.
- 636 Wagner, A. 2011. The origins of evolutionary innovations: a theory of transformative change in  
637           living systems. Oxford University Press, Oxford.
- 638 Wang, S. P., and D. M. Althoff. 2019. Phenotypic plasticity facilitates initial colonization of a  
639           novel environment. *Evolution.* 73:303–316.
- 640 West-Eberhard, M. J. 2003. Developmental plasticity and evolution. Oxford University Press,  
641           New York.
- 642 Willing, E. M., P. Bentzen, C. Van Oosterhout, M. Hoffmann, J. Cable, F. Breden, D. Weigel,  
643           and C. Dreyer. 2010. Genome-wide single nucleotide polymorphisms reveal population  
644           history and adaptive divergence in wild guppies. *Mol. Ecol.* 19:968–984.
- 645 Zandonà, E., S. K. Auer, S. S. Kilham, J. L. Howard, A. López-Sepulcre, M. P. O’Connor, R. D.  
646           Bassar, A. Osorio, C. M. Pringle, and D. N. Reznick. 2011. Diet quality and prey selectivity  
647           correlate with life histories and predation regime in Trinidadian guppies. *Funct. Ecol.*  
648           25:964–973.
